# Supplementary material
Source: publisher site journal article supplement (https://www.dovepress.com/article/382116)
Supplement: Supplementary file 1 [file get_supplementary_file.php]

**Supplementary files**

**Supplementary Table 1**. Detailed information of studies and datasets used in the present study.

**Supplementary Table 2**. Association of the instrumental SNPs with AAs and prostate cancer.

**Supplementary Table 3.** Genetic variants for ALT and their association with the risk of prostate cancer.

**Supplementary Table 4**. Variances explained by the selected instruments, F-statistics and power calculations for Mendelian randomization analyses among European populations.

**Supplementary Table 5**. Pleiotropic associations of the SNPs used as instrumental variables for Alanine aminotransferase.

**Supplementary Table 6.** MR effect estimates for the associations between alanine aminotransferase and risk of prostate cancer after excluding potential pleiotropic SNPs.

**Supplementary Figure 1**. Leave-one-out sensitivity analysis for the association of genetically determined ALT levels with the risk of prostate cancer. The horizontal lines correspond to the OR and 95% CI using the inverse variance weighted method.

| **Supplementary Table 1**. Detailed information of studies and datasets used in the present study. | | | | |
| --- | --- | --- | --- | --- |
| Exposure or outcome | Study or consortium | Participants or Cases/Controls | Ancestry | Web source |
| PrCa | Prostate Cancer Association Group to Investigate Cancer Associated Alterations in the Genome (PRACTICAL) consortium | 79,148 PrCa cases and 61,106 controls | European ancestry | [http://practical.icr.ac.uk](http://practical.icr.ac.uk/) |
| AAs | Lotta *et al.* | 86,507 participants | European ancestry | <https://www.nature.com/articles/s41588-020-00751-5> |
| ALT | Pazoki *et al.* | 315,572 individuals | European ancestry | <https://www.nature.com/articles/s41467-021-22338-2> |

| **Supplementary Table 2**. Association of the instrumental SNPs with AAs and PrCa. | | | | | | | | | |  |  |
| --- | --- | --- | --- | --- | --- | --- | --- | --- | --- | --- | --- |
| Traits | SNP | Chr | Position | EA | SNP-AAs | | |  | SNP-PrCa | | |
| β | SE | P-value |  | β | SE | P-value |
| Alanine | rs2016939 | 1 | 207240289 | A | 0.053 | 0.006 | 5.51E-21 |  | -0.009 | 0.008 | 0.277 |
|  | rs17712208 | 1 | 214150445 | A | 0.118 | 0.016 | 2.53E-14 |  | 0.033 | 0.031 | 0.284 |
|  | rs1260326 | 2 | 27730940 | T | 0.052 | 0.006 | 2.22E-20 |  | 0.022 | 0.008 | 0.007 |
|  | rs10211524 | 2 | 65208074 | G | 0.042 | 0.006 | 3.82E-13 |  | 0.008 | 0.009 | 0.399 |
|  | rs1440581 | 4 | 89226422 | T | 0.033 | 0.006 | 2.81E-09 |  | -0.002 | 0.008 | 0.809 |
|  | rs13232120 | 7 | 72983310 | T | 0.051 | 0.009 | 1.76E-09 |  | 0.020 | 0.014 | 0.137 |
|  | rs2306386 | 8 | 145742879 | T | 0.032 | 0.006 | 6.63E-09 |  | -0.007 | 0.008 | 0.391 |
|  | rs4237150 | 9 | 4290085 | C | 0.032 | 0.006 | 2.60E-08 |  | 0.022 | 0.008 | 0.008 |
|  | rs2168101 | 11 | 8255408 | C | 0.035 | 0.006 | 3.49E-08 |  | 0.003 | 0.010 | 0.759 |
|  | rs964184 | 11 | 116648917 | C | 0.048 | 0.008 | 4.81E-09 |  | 0.013 | 0.012 | 0.255 |
|  | rs4554975 | 12 | 47201814 | A | 0.057 | 0.006 | 1.65E-23 |  | 0.020 | 0.008 | 0.017 |
|  | rs2638314 | 12 | 56866334 | A | 0.081 | 0.007 | 2.85E-29 |  | 0.017 | 0.011 | 0.124 |
|  | rs17122585 | 12 | 59909653 | G | 0.057 | 0.009 | 5.45E-11 |  | -0.040 | 0.013 | 0.002 |
|  | rs8061221 | 16 | 70078960 | A | 0.062 | 0.006 | 1.71E-22 |  | 0.002 | 0.009 | 0.843 |
|  | rs7412 | 19 | 45412079 | T | 0.065 | 0.010 | 1.93E-10 |  | 0.004 | 0.015 | 0.795 |
|  | rs1780638 | 22 | 19177522 | G | 0.032 | 0.006 | 2.13E-08 |  | -0.005 | 0.009 | 0.582 |
| Arginine | rs715 | 2 | 211543055 | T | 0.081 | 0.010 | 4.92E-16 |  | -0.010 | 0.009 | 0.248 |
|  | rs10189479 | 2 | 219287276 | A | 0.057 | 0.009 | 8.97E-10 |  | -0.001 | 0.008 | 0.896 |
|  | rs12499429 | 4 | 144811067 | A | 0.070 | 0.010 | 2.15E-12 |  | -0.001 | 0.009 | 0.916 |
|  | rs17788484 | 6 | 131894358 | C | 0.490 | 0.033 | 8.76E-49 |  | -0.012 | 0.031 | 0.705 |
|  | rs592423 | 6 | 139840693 | A | 0.064 | 0.009 | 5.11E-12 |  | -0.025 | 0.008 | 0.002 |
|  | rs56335308 | 8 | 17419461 | G | 0.278 | 0.030 | 4.65E-20 |  | 0.013 | 0.032 | 0.686 |
|  | rs17666239 | 12 | 47194757 | A | 0.104 | 0.018 | 1.38E-08 |  | 0.022 | 0.016 | 0.175 |
|  | rs7199750 | 16 | 68351859 | G | 0.060 | 0.010 | 3.04E-09 |  | -0.009 | 0.009 | 0.313 |
|  | rs11085824 | 19 | 13001547 | A | 0.096 | 0.010 | 1.08E-23 |  | -0.012 | 0.009 | 0.153 |
| Aspartate | rs715 | 2 | 211543055 | T | 0.070 | 0.010 | 3.36E-12 |  | -0.010 | 0.009 | 0.248 |
|  | rs4690522 | 4 | 178361051 | C | 0.172 | 0.010 | 1.06E-72 |  | -0.003 | 0.009 | 0.718 |
|  | rs7964859 | 12 | 102220783 | C | 0.123 | 0.010 | 2.31E-33 |  | -0.001 | 0.009 | 0.879 |
| Glutamine | rs79687284 | 1 | 214150821 | C | 0.084 | 0.010 | 6.62E-18 |  | -0.0002 | 0.009 | 0.983 |
|  | rs1260326 | 2 | 27730940 | C | 0.067 | 0.006 | 1.37E-30 |  | 0.022 | 0.008 | 0.007 |
|  | rs7587672 | 2 | 191723275 | G | 0.059 | 0.007 | 3.46E-19 |  | 0.028 | 0.010 | 0.004 |
|  | rs34430945 | 7 | 73043665 | C | 0.071 | 0.009 | 1.43E-16 |  | 0.023 | 0.013 | 0.087 |
|  | rs13281892 | 8 | 17372697 | A | 0.047 | 0.006 | 2.20E-14 |  | 0.007 | 0.010 | 0.454 |
|  | rs7078003 | 10 | 99359412 | T | 0.082 | 0.008 | 1.03E-27 |  | 0.010 | 0.011 | 0.403 |
|  | rs2168101 | 11 | 8255408 | C | 0.042 | 0.007 | 1.87E-10 |  | 0.003 | 0.010 | 0.759 |
|  | rs17602430 | 12 | 47185518 | T | 0.122 | 0.011 | 7.17E-27 |  | 0.020 | 0.016 | 0.200 |
|  | rs2657879 | 12 | 56865338 | A | 0.223 | 0.007 | 8.39E-198 |  | -0.017 | 0.011 | 0.128 |
|  | rs17558901 | 12 | 59915849 | A | 0.059 | 0.009 | 8.95E-11 |  | 0.040 | 0.013 | 0.002 |
| Glycine | rs4646961 | 1 | 76217169 | A | 0.048 | 0.006 | 2.86E-14 |  | 0.000 | 0.009 | 0.964 |
|  | rs561931 | 1 | 120254506 | G | 0.033 | 0.006 | 1.66E-08 |  | 0.024 | 0.008 | 0.004 |
|  | rs715 | 2 | 211543055 | C | 0.444 | 0.006 | 1.17E-1107 |  | -0.010 | 0.009 | 0.248 |
|  | rs9862438 | 3 | 125910381 | T | 0.058 | 0.006 | 3.23E-23 |  | 0.008 | 0.008 | 0.341 |
|  | rs2545801 | 5 | 176841339 | C | 0.042 | 0.007 | 1.89E-10 |  | 0.003 | 0.009 | 0.754 |
|  | rs543159 | 6 | 160776017 | A | 0.035 | 0.006 | 1.25E-09 |  | -0.076 | 0.008 | 0.000 |
|  | rs4947534 | 7 | 56079094 | C | 0.072 | 0.007 | 1.83E-27 |  | -0.016 | 0.010 | 0.085 |
|  | rs9987289 | 8 | 9183358 | A | 0.124 | 0.010 | 2.60E-35 |  | 0.005 | 0.014 | 0.724 |
|  | rs28601761 | 8 | 126500031 | G | 0.063 | 0.006 | 5.46E-26 |  | -0.004 | 0.009 | 0.653 |
|  | rs17591030 | 9 | 6550024 | C | 0.081 | 0.006 | 7.49E-36 |  | 0.009 | 0.009 | 0.300 |
|  | rs676996 | 9 | 136146077 | T | 0.040 | 0.006 | 1.75E-10 |  | -0.007 | 0.008 | 0.403 |
|  | rs10740134 | 10 | 65315433 | T | 0.038 | 0.006 | 3.59E-11 |  | -0.0003 | 0.008 | 0.968 |
|  | rs12297321 | 12 | 47109387 | T | 0.048 | 0.008 | 1.14E-09 |  | 0.008 | 0.011 | 0.501 |
|  | rs9923732 | 16 | 81110903 | A | 0.119 | 0.011 | 1.65E-28 |  | -0.040 | 0.015 | 0.008 |
|  | rs8078686 | 17 | 45735706 | C | 0.035 | 0.006 | 1.53E-09 |  | 0.006 | 0.008 | 0.486 |
| Histidine | rs780093 | 2 | 27742603 | C | 0.046 | 0.006 | 4.49E-15 |  | 0.022 | 0.008 | 0.008 |
|  | rs715 | 2 | 211543055 | T | 0.054 | 0.006 | 1.34E-17 |  | -0.010 | 0.009 | 0.248 |
|  | rs5030062 | 3 | 186454180 | C | 0.049 | 0.006 | 1.40E-16 |  | 0.011 | 0.009 | 0.182 |
|  | rs3733402 | 4 | 187158034 | A | 0.073 | 0.006 | 4.09E-36 |  | 0.007 | 0.008 | 0.402 |
|  | rs2545801 | 5 | 176841339 | C | 0.071 | 0.007 | 2.01E-26 |  | 0.003 | 0.009 | 0.754 |
|  | rs635634 | 9 | 136155000 | C | 0.049 | 0.008 | 3.93E-11 |  | 0.006 | 0.010 | 0.580 |
|  | rs61937878 | 12 | 96371731 | T | 0.855 | 0.037 | 7.43E-119 |  | 0.105 | 0.103 | 0.308 |
|  | rs35291299 | 14 | 21515620 | G | 0.063 | 0.009 | 1.05E-12 |  | -0.002 | 0.014 | 0.900 |
| Isoleucine | rs1440581 | 4 | 89226422 | C | 0.044 | 0.005 | 6.14E-19 |  | -0.002 | 0.008 | 0.809 |
|  | rs7298123 | 12 | 56860073 | C | 0.035 | 0.006 | 1.24E-08 |  | -0.020 | 0.011 | 0.065 |
|  | rs12149660 | 16 | 70309237 | G | 0.064 | 0.008 | 1.25E-16 |  | 0.003 | 0.013 | 0.840 |
|  | rs493841 | 19 | 49301877 | T | 0.035 | 0.005 | 1.94E-12 |  | -0.002 | 0.009 | 0.833 |
| Leucine | rs1260326 | 2 | 27730940 | T | 0.029 | 0.005 | 1.71E-08 |  | 0.022 | 0.008 | 0.007 |
|  | rs7678928 | 4 | 89222827 | T | 0.048 | 0.005 | 7.09E-22 |  | 0.0004 | 0.008 | 0.957 |
|  | rs4253272 | 4 | 187163614 | T | 0.031 | 0.005 | 6.91E-10 |  | 0.006 | 0.008 | 0.433 |
|  | rs964184 | 11 | 116648917 | C | 0.064 | 0.007 | 3.11E-18 |  | 0.013 | 0.012 | 0.255 |
|  | rs261334 | 15 | 58726744 | C | 0.046 | 0.006 | 4.55E-14 |  | -0.018 | 0.010 | 0.068 |
|  | rs12149660 | 16 | 70309237 | G | 0.067 | 0.008 | 2.71E-17 |  | 0.003 | 0.013 | 0.840 |
| Lysine | rs7658095 | 4 | 139927828 | G | 0.068 | 0.010 | 1.10E-11 |  | -0.005 | 0.009 | 0.621 |
|  | rs138373837 | 5 | 36219710 | T | 0.301 | 0.030 | 2.07E-23 |  | -0.020 | 0.029 | 0.499 |
|  | rs2608920 | 6 | 131873703 | T | 0.071 | 0.011 | 1.15E-10 |  | 0.012 | 0.010 | 0.222 |
|  | rs2517237 | 8 | 17375959 | G | 0.098 | 0.012 | 1.56E-17 |  | 0.019 | 0.011 | 0.088 |
|  | rs7005693 | 8 | 49987965 | C | 0.111 | 0.009 | 1.32E-33 |  | -0.005 | 0.008 | 0.547 |
|  | rs2657880 | 12 | 56863770 | C | 0.073 | 0.012 | 8.75E-10 |  | 0.015 | 0.011 | 0.187 |
|  | rs1059263 | 14 | 100769367 | C | 0.067 | 0.010 | 3.44E-11 |  | 0.001 | 0.009 | 0.935 |
|  | rs8056893 | 16 | 68304392 | A | 0.195 | 0.010 | 1.00E-79 |  | 0.017 | 0.009 | 0.069 |
|  | rs11554714 | 22 | 37407109 | G | 0.182 | 0.025 | 1.41E-13 |  | -0.010 | 0.024 | 0.681 |
| Methionine | rs6891672 | 5 | 90243899 | T | 0.065 | 0.010 | 3.32E-11 |  | -0.005 | 0.009 | 0.571 |
| Phenylalanine | rs710446 | 3 | 186459927 | C | 0.047 | 0.006 | 5.86E-17 |  | 0.013 | 0.008 | 0.123 |
|  | rs1800787 | 4 | 155484015 | T | 0.050 | 0.007 | 2.82E-13 |  | -0.011 | 0.010 | 0.282 |
|  | rs4253238 | 4 | 187148387 | T | 0.081 | 0.005 | 1.17E-49 |  | 0.008 | 0.008 | 0.344 |
|  | rs2731672 | 5 | 176842474 | C | 0.061 | 0.006 | 1.07E-21 |  | 0.003 | 0.010 | 0.729 |
|  | rs2649667 | 11 | 57270509 | G | 0.039 | 0.006 | 6.05E-10 |  | -0.007 | 0.010 | 0.438 |
|  | rs869916 | 12 | 103244013 | G | 0.078 | 0.006 | 3.53E-44 |  | 0.001 | 0.008 | 0.909 |
|  | rs1065853 | 19 | 45413233 | T | 0.064 | 0.010 | 2.44E-10 |  | 0.011 | 0.015 | 0.456 |
| Proline | rs10882649 | 10 | 97426086 | G | 0.054 | 0.009 | 5.93E-09 |  | 0.001 | 0.009 | 0.924 |
|  | rs17666239 | 12 | 47194757 | A | 0.113 | 0.018 | 1.79E-10 |  | 0.022 | 0.016 | 0.175 |
|  | rs3970551 | 22 | 18906839 | G | 0.480 | 0.015 | 2.41E-226 |  | -0.002 | 0.015 | 0.899 |
| Serine | rs477992 | 1 | 120257576 | G | 0.184 | 0.010 | 2.01E-80 |  | 0.018 | 0.009 | 0.038 |
|  | rs1260326 | 2 | 27730940 | C | 0.085 | 0.009 | 2.48E-20 |  | 0.022 | 0.008 | 0.007 |
|  | rs715 | 2 | 211543055 | C | 0.167 | 0.010 | 3.32E-64 |  | -0.010 | 0.009 | 0.248 |
|  | rs4947534 | 7 | 56079094 | C | 0.162 | 0.011 | 1.01E-53 |  | -0.016 | 0.010 | 0.085 |
|  | rs28601761 | 8 | 126500031 | G | 0.075 | 0.010 | 4.17E-15 |  | -0.004 | 0.009 | 0.653 |
| Threonine | rs1260326 | 2 | 27730940 | C | 0.123 | 0.009 | 8.01E-40 |  | 0.022 | 0.008 | 0.007 |
|  | rs715 | 2 | 211543055 | T | 0.073 | 0.010 | 2.45E-13 |  | -0.010 | 0.009 | 0.248 |
|  | rs72661853 | 8 | 74876293 | T | 0.104 | 0.010 | 6.46E-25 |  | -0.011 | 0.009 | 0.231 |
|  | rs2465216 | 12 | 47240162 | C | 0.077 | 0.010 | 2.42E-15 |  | -0.022 | 0.009 | 0.011 |
|  | rs2657879 | 12 | 56865338 | G | 0.092 | 0.012 | 6.96E-15 |  | -0.017 | 0.011 | 0.128 |
|  | rs74095612 | 12 | 59970332 | T | 0.092 | 0.015 | 2.45E-10 |  | 0.029 | 0.013 | 0.024 |
|  | rs1742425 | 16 | 1904524 | G | 0.084 | 0.011 | 1.92E-13 |  | -0.028 | 0.010 | 0.005 |
| Tryptophan | rs17314234 | 4 | 156810755 | C | 0.172 | 0.015 | 2.03E-30 |  | -0.010 | 0.013 | 0.473 |
|  | rs17756732 | 6 | 111580154 | C | 0.118 | 0.013 | 1.14E-20 |  | -0.007 | 0.012 | 0.561 |
| Tyrosine | rs241768 | 6 | 111492119 | T | 0.125 | 0.006 | 1.71E-85 |  | 0.002 | 0.009 | 0.862 |
|  | rs1935 | 10 | 64927823 | G | 0.034 | 0.006 | 2.86E-09 |  | -0.003 | 0.008 | 0.695 |
|  | rs17666239 | 12 | 47194757 | A | 0.079 | 0.011 | 1.65E-12 |  | 0.022 | 0.016 | 0.175 |
|  | rs2638314 | 12 | 56866334 | A | 0.060 | 0.007 | 2.84E-16 |  | 0.017 | 0.011 | 0.124 |
|  | rs2393775 | 12 | 121424574 | G | 0.038 | 0.006 | 1.42E-10 |  | -0.013 | 0.008 | 0.114 |
|  | rs117866491 | 16 | 71628046 | T | 0.333 | 0.024 | 1.52E-45 |  | 0.003 | 0.037 | 0.943 |
| Valine | rs2422358 | 2 | 65231806 | T | 0.062 | 0.006 | 1.19E-25 |  | -0.012 | 0.010 | 0.227 |
|  | rs7678928 | 4 | 89222827 | T | 0.080 | 0.006 | 7.33E-46 |  | 0.0004 | 0.008 | 0.957 |
|  | rs964184 | 11 | 116648917 | C | 0.074 | 0.008 | 2.57E-19 |  | 0.013 | 0.012 | 0.255 |
|  | rs12149660 | 16 | 70309237 | G | 0.070 | 0.009 | 2.29E-15 |  | 0.003 | 0.013 | 0.840 |
|  | rs117643180 | 17 | 7185779 | C | 0.123 | 0.018 | 6.01E-12 |  | 0.031 | 0.028 | 0.266 |
|  | rs4801776 | 19 | 49304215 | C | 0.056 | 0.006 | 1.86E-18 |  | 0.0001 | 0.010 | 0.991 |

| **Supplementary Table 3.** Genetic variants for ALT and their association with the risk of prostate cancer. | | | | | | | | | | |  |
| --- | --- | --- | --- | --- | --- | --- | --- | --- | --- | --- | --- |
| Traits | SNP | Chr | Position | EA | SNP-ALT | | |  | SNP-PrCa | | |
| β | SE | *P*-value |  | β | SE | *P*-value |
| ALT | rs11582968 | 1 | 2176126 | T | -0.0060 | 0.0007 | 1.60E-15 |  | 0.0161 | 0.0168 | 0.3356 |
|  | rs1497406 | 1 | 16505320 | A | -0.0071 | 0.0004 | 4.70E-72 |  | 0.0077 | 0.0082 | 0.3479 |
|  | rs114165349 | 1 | 27021913 | G | -0.0170 | 0.0013 | 2.20E-39 |  | -0.0242 | 0.0277 | 0.3823 |
|  | rs2356864 | 1 | 50839740 | G | -0.0027 | 0.0004 | 7.70E-12 |  | -0.0328 | 0.0081 | 0.0000 |
|  | rs12140153 | 1 | 62579891 | G | 0.0041 | 0.0007 | 1.30E-09 |  | 0.0079 | 0.0149 | 0.5951 |
|  | rs6688625 | 1 | 66161698 | C | -0.0037 | 0.0005 | 7.00E-13 |  | 0.0097 | 0.0104 | 0.3546 |
|  | rs805047 | 1 | 89242372 | A | -0.0033 | 0.0004 | 5.30E-16 |  | -0.0048 | 0.0083 | 0.5657 |
|  | rs2114271 | 1 | 93876429 | A | 0.0033 | 0.0005 | 6.80E-11 |  | -0.0020 | 0.0104 | 0.8448 |
|  | rs140584594 | 1 | 110232983 | A | -0.0041 | 0.0004 | 4.00E-21 |  | -0.0352 | 0.0246 | 0.1532 |
|  | rs144830380 | 1 | 149950326 | T | 0.0146 | 0.0018 | 5.90E-16 |  | 0.0526 | 0.0440 | 0.2316 |
|  | rs1815544 | 1 | 150479901 | C | 0.0037 | 0.0004 | 1.50E-20 |  | 0.0162 | 0.0081 | 0.0462 |
|  | rs6684154 | 1 | 150981225 | C | 0.0151 | 0.0016 | 1.40E-21 |  | -0.0627 | 0.0362 | 0.0835 |
|  | rs12904 | 1 | 155106697 | G | 0.0053 | 0.0004 | 5.20E-43 |  | 0.0162 | 0.0081 | 0.0463 |
|  | rs3790459 | 1 | 156461707 | A | -0.0029 | 0.0004 | 4.80E-13 |  | 0.0139 | 0.0085 | 0.0995 |
|  | rs6695321 | 1 | 196675861 | A | -0.0026 | 0.0004 | 3.40E-11 |  | 0.0041 | 0.0082 | 0.6137 |
|  | rs61823192 | 1 | 219294570 | C | -0.0083 | 0.0012 | 4.10E-12 |  | 0.0085 | 0.0299 | 0.7755 |
|  | rs188273166 | 1 | 220101499 | G | -0.0575 | 0.0056 | 1.90E-25 |  | -0.2007 | 0.1453 | 0.1673 |
|  | rs2642438 | 1 | 220970028 | A | -0.0068 | 0.0004 | 6.20E-57 |  | -0.0026 | 0.0091 | 0.7739 |
|  | rs4925546 | 1 | 247602968 | A | 0.0034 | 0.0004 | 8.20E-17 |  | 0.0108 | 0.0085 | 0.2062 |
|  | rs75331444 | 2 | 44069772 | G | -0.0074 | 0.0008 | 3.00E-21 |  | 0.0132 | 0.0160 | 0.4081 |
|  | rs4290706 | 2 | 48541044 | T | 0.0027 | 0.0004 | 2.20E-13 |  | 0.0006 | 0.0082 | 0.9416 |
|  | rs13389219 | 2 | 165528876 | C | 0.0045 | 0.0004 | 1.70E-30 |  | -0.0075 | 0.0081 | 0.3512 |
|  | rs1862069 | 2 | 169933741 | G | -0.0036 | 0.0004 | 3.50E-22 |  | 0.0022 | 0.0085 | 0.7920 |
|  | rs78387065 | 2 | 170618468 | T | 0.0045 | 0.0007 | 8.70E-12 |  | -0.0061 | 0.0139 | 0.6608 |
|  | rs13026251 | 2 | 179367560 | C | -0.0026 | 0.0004 | 9.50E-11 |  | -0.0047 | 0.0087 | 0.5873 |
|  | rs3731714 | 2 | 202060820 | C | 0.0027 | 0.0004 | 7.00E-11 |  | 0.0416 | 0.0085 | 0.0000 |
|  | rs2943654 | 2 | 227112754 | C | -0.0052 | 0.0004 | 1.10E-38 |  | 0.0099 | 0.0085 | 0.2413 |
|  | rs13395911 | 2 | 233520254 | A | -0.0061 | 0.0004 | 5.10E-53 |  | 0.0387 | 0.0082 | 0.0000 |
|  | rs13083375 | 3 | 12365308 | G | 0.0069 | 0.0006 | 7.10E-32 |  | 0.0132 | 0.0120 | 0.2719 |
|  | rs4647222 | 3 | 37042960 | A | 0.0030 | 0.0004 | 4.00E-15 |  | -0.0100 | 0.0080 | 0.2121 |
|  | rs5852449 | 3 | 124927668 | A | -0.0032 | 0.0004 | 1.80E-14 |  | -0.0200 | 0.0095 | 0.0351 |
|  | rs2364368 | 3 | 125905080 | A | -0.0025 | 0.0004 | 5.30E-10 |  | -0.0078 | 0.0083 | 0.3482 |
|  | rs645040 | 3 | 135926622 | G | -0.0054 | 0.0005 | 1.40E-31 |  | 0.0089 | 0.0097 | 0.3610 |
|  | rs1872240 | 3 | 136503896 | C | -0.0043 | 0.0004 | 7.70E-24 |  | -0.0075 | 0.0087 | 0.3919 |
|  | rs55726682 | 3 | 141890089 | A | -0.0038 | 0.0006 | 1.30E-10 |  | 0.0003 | 0.0136 | 0.9822 |
|  | rs6440123 | 3 | 142659361 | A | 0.0034 | 0.0004 | 1.50E-17 |  | 0.0036 | 0.0086 | 0.6739 |
|  | rs1594320 | 3 | 149114757 | G | 0.0042 | 0.0004 | 1.10E-22 |  | -0.0109 | 0.0096 | 0.2586 |
|  | rs7610095 | 3 | 152035637 | G | 0.0025 | 0.0004 | 3.70E-11 |  | 0.0447 | 0.0081 | 0.0000 |
|  | rs407258 | 3 | 155560978 | T | 0.0027 | 0.0004 | 7.20E-10 |  | -0.0172 | 0.0092 | 0.0614 |
|  | rs67261871 | 3 | 156797941 | T | -0.0032 | 0.0004 | 1.40E-15 |  | -0.0242 | 0.0083 | 0.0037 |
|  | rs73875254 | 3 | 160029132 | A | -0.0042 | 0.0004 | 7.20E-22 |  | -0.0292 | 0.0092 | 0.0016 |
|  | rs5402 | 3 | 170727739 | T | -0.0040 | 0.0006 | 1.70E-11 |  | -0.0254 | 0.0120 | 0.0342 |
|  | rs79287178 | 3 | 172294500 | G | 0.0180 | 0.0012 | 1.00E-55 |  | 0.0129 | 0.0245 | 0.5985 |
|  | rs4077189 | 3 | 185796785 | G | 0.0042 | 0.0007 | 6.60E-10 |  | 0.0153 | 0.0144 | 0.2863 |
|  | rs13108218 | 4 | 3443931 | A | 0.0031 | 0.0004 | 9.20E-15 |  | 0.0035 | 0.0087 | 0.6829 |
|  | rs35088884 | 4 | 69357050 | A | 0.0026 | 0.0004 | 8.30E-11 |  | 0.0068 | 0.0092 | 0.4610 |
|  | rs12500824 | 4 | 77416627 | A | 0.0038 | 0.0004 | 3.10E-21 |  | -0.0146 | 0.0087 | 0.0922 |
|  | rs62307409 | 4 | 87269712 | A | 0.0034 | 0.0005 | 2.40E-14 |  | -0.0067 | 0.0093 | 0.4693 |
|  | rs71633359 | 4 | 88183820 | T | 0.0089 | 0.0004 | 9.80E-97 |  | -0.0053 | 0.0090 | 0.5521 |
|  | rs28431971 | 4 | 100487315 | G | 0.0033 | 0.0004 | 9.60E-13 |  | -0.0006 | 0.0092 | 0.9437 |
|  | rs11727676 | 4 | 145659064 | T | -0.0049 | 0.0007 | 1.00E-13 |  | 0.0002 | 0.0147 | 0.9897 |
|  | rs4835265 | 4 | 146821410 | C | -0.0097 | 0.0005 | 7.70E-76 |  | -0.0141 | 0.0106 | 0.1831 |
|  | rs10075805 | 5 | 31021358 | A | 0.0056 | 0.0004 | 3.90E-38 |  | 0.0019 | 0.0092 | 0.8356 |
|  | rs4074793 | 5 | 52193125 | A | -0.0055 | 0.0007 | 1.90E-14 |  | 0.0223 | 0.0149 | 0.1364 |
|  | rs1694068 | 5 | 53283630 | T | -0.0025 | 0.0004 | 8.90E-10 |  | -0.0050 | 0.0082 | 0.5429 |
|  | rs28650790 | 5 | 55861464 | C | -0.0050 | 0.0005 | 2.40E-23 |  | 0.0204 | 0.0108 | 0.0591 |
|  | rs4976033 | 5 | 67714246 | A | -0.0028 | 0.0004 | 1.80E-12 |  | 0.0054 | 0.0089 | 0.5486 |
|  | rs4704043 | 5 | 72159179 | C | -0.0030 | 0.0004 | 5.50E-12 |  | 0.0016 | 0.0088 | 0.8528 |
|  | rs2544645 | 5 | 72919127 | G | 0.0030 | 0.0004 | 7.70E-12 |  | -0.0004 | 0.0094 | 0.9638 |
|  | rs6879279 | 5 | 106878792 | G | 0.0042 | 0.0005 | 3.50E-15 |  | -0.0083 | 0.0114 | 0.4692 |
|  | rs288139 | 5 | 107400505 | G | 0.0031 | 0.0005 | 9.90E-11 |  | 0.0076 | 0.0095 | 0.4242 |
|  | rs6888037 | 5 | 127406259 | G | -0.0029 | 0.0005 | 8.90E-11 |  | 0.0065 | 0.0095 | 0.4968 |
|  | rs72801474 | 5 | 132444128 | G | 0.0047 | 0.0007 | 2.50E-13 |  | -0.0356 | 0.0164 | 0.0302 |
|  | rs1030270 | 5 | 156703572 | C | 0.0065 | 0.0008 | 6.40E-15 |  | 0.0310 | 0.0165 | 0.0595 |
|  | rs35742417 | 6 | 7247344 | C | 0.0033 | 0.0005 | 8.50E-12 |  | -0.0044 | 0.0104 | 0.6726 |
|  | rs6899343 | 6 | 15502273 | A | -0.0029 | 0.0005 | 1.00E-10 |  | 0.0166 | 0.0094 | 0.0760 |
|  | rs73382439 | 6 | 20404420 | T | -0.0038 | 0.0005 | 8.20E-13 |  | 0.0000 | 0.0104 | 0.9996 |
|  | rs12192041 | 6 | 21924904 | T | 0.0032 | 0.0004 | 2.40E-14 |  | -0.0262 | 0.0091 | 0.0040 |
|  | rs13197551 | 6 | 35283958 | T | 0.0032 | 0.0005 | 5.60E-11 |  | -0.0149 | 0.0103 | 0.1495 |
|  | rs4714001 | 6 | 36638175 | G | -0.0024 | 0.0004 | 1.20E-09 |  | -0.0108 | 0.0082 | 0.1878 |
|  | rs7760250 | 6 | 42929839 | G | 0.0029 | 0.0004 | 6.60E-14 |  | 0.0273 | 0.0079 | 0.0006 |
|  | rs4711750 | 6 | 43757082 | T | -0.0032 | 0.0004 | 3.10E-16 |  | -0.0055 | 0.0083 | 0.5060 |
|  | rs625899 | 6 | 53957588 | T | 0.0032 | 0.0004 | 2.60E-13 |  | -0.0084 | 0.0089 | 0.3453 |
|  | rs1890426 | 6 | 116338065 | T | -0.0032 | 0.0004 | 5.80E-16 |  | 0.0010 | 0.0081 | 0.8979 |
|  | rs72959041 | 6 | 127454893 | G | -0.0074 | 0.0009 | 7.70E-16 |  | 0.0000 | 0.0196 | 0.9997 |
|  | rs4351283 | 6 | 130374711 | T | -0.0031 | 0.0004 | 5.00E-14 |  | -0.0339 | 0.0086 | 0.0001 |
|  | rs71562509 | 6 | 139835423 | G | 0.0027 | 0.0004 | 8.50E-12 |  | 0.0211 | 0.0082 | 0.0099 |
|  | rs17710008 | 6 | 153043035 | G | -0.0031 | 0.0005 | 1.10E-09 |  | -0.0034 | 0.0111 | 0.7595 |
|  | rs3123129 | 6 | 159227768 | T | 0.0026 | 0.0004 | 4.80E-11 |  | -0.0120 | 0.0082 | 0.1418 |
|  | rs702484 | 7 | 6431933 | C | -0.0028 | 0.0004 | 1.80E-11 |  | -0.0031 | 0.0089 | 0.7281 |
|  | rs917116 | 7 | 28172739 | T | -0.0040 | 0.0005 | 6.10E-17 |  | 0.0214 | 0.0096 | 0.0253 |
|  | rs2710804 | 7 | 36084529 | T | 0.0028 | 0.0004 | 1.20E-11 |  | -0.0052 | 0.0084 | 0.5358 |
|  | rs4948099 | 7 | 56072250 | C | 0.0027 | 0.0005 | 4.40E-10 |  | 0.0154 | 0.0095 | 0.1049 |
|  | rs17145738 | 7 | 72982874 | C | -0.0061 | 0.0006 | 3.90E-25 |  | -0.0175 | 0.0136 | 0.1969 |
|  | rs236651 | 7 | 75044830 | G | -0.0026 | 0.0004 | 8.50E-11 |  | -0.0171 | 0.0083 | 0.0401 |
|  | rs55747905 | 7 | 87127099 | T | 0.0060 | 0.0005 | 4.50E-33 |  | 0.0036 | 0.0107 | 0.7386 |
|  | rs445 | 7 | 92408370 | C | -0.0069 | 0.0007 | 1.50E-26 |  | -0.0022 | 0.0139 | 0.8745 |
|  | rs11770163 | 7 | 116417848 | G | -0.0028 | 0.0004 | 1.60E-12 |  | 0.0116 | 0.0085 | 0.1722 |
|  | rs292585 | 7 | 134884187 | C | -0.0030 | 0.0004 | 4.70E-12 |  | -0.0214 | 0.0091 | 0.0189 |
|  | rs2980682 | 8 | 6587270 | A | -0.0033 | 0.0004 | 1.80E-15 |  | -0.0055 | 0.0092 | 0.5497 |
|  | rs3789849 | 8 | 8687054 | G | -0.0041 | 0.0004 | 7.50E-25 |  | 0.0172 | 0.0083 | 0.0386 |
|  | rs1461729 | 8 | 9187242 | A | 0.0090 | 0.0006 | 2.00E-44 |  | 0.0034 | 0.0132 | 0.7969 |
|  | rs7843924 | 8 | 9976540 | C | -0.0037 | 0.0004 | 7.80E-21 |  | 0.0180 | 0.0082 | 0.0281 |
|  | rs4484649 | 8 | 10571491 | C | 0.0043 | 0.0004 | 3.40E-27 |  | -0.0073 | 0.0083 | 0.3740 |
|  | rs6557781 | 8 | 21937667 | T | 0.0042 | 0.0005 | 5.00E-15 |  | 0.0198 | 0.0118 | 0.0942 |
|  | rs2241261 | 8 | 22876739 | C | 0.0025 | 0.0004 | 1.10E-10 |  | 0.0311 | 0.0079 | 0.0001 |
|  | rs28471687 | 8 | 72459582 | A | -0.0050 | 0.0007 | 1.40E-12 |  | -0.0151 | 0.0164 | 0.3581 |
|  | rs28416970 | 8 | 96092046 | G | -0.0029 | 0.0004 | 3.20E-11 |  | 0.0132 | 0.0090 | 0.1402 |
|  | rs13275089 | 8 | 103662852 | T | 0.0033 | 0.0004 | 1.60E-17 |  | 0.0122 | 0.0084 | 0.1446 |
|  | rs2954021 | 8 | 126482077 | A | 0.0081 | 0.0004 | 4.50E-98 |  | -0.0031 | 0.0081 | 0.6985 |
|  | rs559085666 | 8 | 144546298 | G | 0.0766 | 0.0066 | 4.10E-32 |  | -0.2836 | 0.1571 | 0.0712 |
|  | rs147998249 | 8 | 145732180 | G | 0.2181 | 0.0047 | 9.00E-428 |  | 0.0411 | 0.0943 | 0.6627 |
|  | rs10971930 | 9 | 34116083 | T | -0.0038 | 0.0006 | 1.10E-10 |  | 0.0112 | 0.0120 | 0.3486 |
|  | rs7018885 | 9 | 95892726 | T | 0.0038 | 0.0004 | 9.30E-18 |  | -0.0153 | 0.0101 | 0.1281 |
|  | rs68082079 | 9 | 112077530 | T | 0.0028 | 0.0004 | 6.70E-11 |  | -0.0059 | 0.0094 | 0.5319 |
|  | rs7041363 | 9 | 117146043 | C | 0.0096 | 0.0004 | 1.40E-136 |  | -0.0160 | 0.0081 | 0.0470 |
|  | rs7029757 | 9 | 132566666 | G | 0.0054 | 0.0007 | 9.60E-16 |  | 0.0493 | 0.0137 | 0.0003 |
|  | rs151068477 | 10 | 52642516 | G | -0.0139 | 0.0022 | 2.30E-10 |  | -0.0261 | 0.0572 | 0.6479 |
|  | rs9663238 | 10 | 70983629 | A | -0.0060 | 0.0004 | 1.70E-47 |  | -0.0332 | 0.0088 | 0.0002 |
|  | rs3829126 | 10 | 74714177 | G | 0.0044 | 0.0007 | 2.70E-11 |  | 0.0014 | 0.0146 | 0.9242 |
|  | rs12262649 | 10 | 75576366 | C | -0.0025 | 0.0004 | 6.90E-10 |  | -0.0112 | 0.0083 | 0.1759 |
|  | rs7099526 | 10 | 79657705 | C | -0.0053 | 0.0004 | 1.40E-37 |  | 0.0139 | 0.0097 | 0.1512 |
|  | rs10887777 | 10 | 89807366 | T | -0.0030 | 0.0004 | 2.10E-11 |  | -0.0018 | 0.0094 | 0.8510 |
|  | rs61856806 | 10 | 98466282 | T | -0.0038 | 0.0005 | 3.50E-14 |  | 0.0086 | 0.0112 | 0.4414 |
|  | rs56189004 | 10 | 99086632 | A | -0.0030 | 0.0004 | 3.10E-12 |  | 0.0088 | 0.0090 | 0.3288 |
|  | rs185979634 | 10 | 101403323 | T | 0.0105 | 0.0009 | 9.40E-32 |  | -0.0009 | 0.0202 | 0.9663 |
|  | rs2862954 | 10 | 101912064 | T | 0.0121 | 0.0004 | 9.30E-215 |  | 0.0079 | 0.0081 | 0.3280 |
|  | rs10787429 | 10 | 113949664 | T | 0.0058 | 0.0004 | 2.80E-39 |  | 0.0142 | 0.0090 | 0.1141 |
|  | rs61856806 | 10 | 98466282 | T | -0.0038 | 0.0005 | 3.50E-14 |  | 0.0086 | 0.0112 | 0.4414 |
|  | rs11601507 | 11 | 5701074 | C | -0.0081 | 0.0008 | 2.10E-27 |  | -0.0679 | 0.0170 | 0.0001 |
|  | rs2030291 | 11 | 16251251 | A | 0.0025 | 0.0004 | 2.10E-10 |  | -0.0289 | 0.0083 | 0.0005 |
|  | rs7481951 | 11 | 22271870 | A | -0.0029 | 0.0004 | 5.90E-14 |  | -0.0749 | 0.0570 | 0.1886 |
|  | rs143001834 | 11 | 47722571 | G | -0.0054 | 0.0008 | 2.10E-11 |  | -0.0331 | 0.0186 | 0.0743 |
|  | rs11245604 | 11 | 50073263 | G | -0.0041 | 0.0007 | 6.50E-10 |  | -0.0370 | 0.0152 | 0.0147 |
|  | rs4084164 | 11 | 62201458 | A | 0.0033 | 0.0004 | 1.10E-16 |  | 0.0032 | 0.0085 | 0.7062 |
|  | rs56271783 | 11 | 64004723 | G | -0.0059 | 0.0009 | 1.50E-10 |  | -0.0380 | 0.0191 | 0.0472 |
|  | rs2904975 | 11 | 65173754 | C | -0.0031 | 0.0004 | 1.50E-12 |  | -0.0099 | 0.0094 | 0.2895 |
|  | rs519790 | 11 | 72504141 | C | -0.0039 | 0.0004 | 3.40E-22 |  | 0.0128 | 0.0087 | 0.1404 |
|  | rs2511188 | 11 | 77920930 | A | 0.0030 | 0.0005 | 2.50E-10 |  | -0.0053 | 0.0099 | 0.5880 |
|  | rs636672 | 11 | 78596973 | C | -0.0025 | 0.0004 | 4.20E-10 |  | -0.0188 | 0.0086 | 0.0291 |
|  | rs11605469 | 11 | 93282129 | C | 0.0060 | 0.0008 | 1.50E-14 |  | -0.0373 | 0.0181 | 0.0399 |
|  | rs7117339 | 11 | 93870338 | C | 0.0117 | 0.0006 | 1.80E-83 |  | -0.0136 | 0.0124 | 0.2704 |
|  | rs141949189 | 11 | 118957388 | A | -0.0024 | 0.0004 | 1.30E-09 |  | -0.0050 | 0.0087 | 0.5619 |
|  | rs76118307 | 11 | 125443002 | A | -0.0054 | 0.0009 | 8.80E-11 |  | -0.0080 | 0.0173 | 0.6425 |
|  | rs76895963 | 12 | 4384844 | T | 0.0120 | 0.0015 | 4.10E-16 |  | -0.0383 | 0.0317 | 0.2271 |
|  | rs2981595 | 12 | 10583297 | G | 0.0049 | 0.0006 | 1.20E-19 |  | 0.0024 | 0.0112 | 0.8300 |
|  | rs12824533 | 12 | 11791685 | A | -0.0035 | 0.0004 | 3.60E-19 |  | 0.0170 | 0.0083 | 0.0405 |
|  | rs60140950 | 12 | 21028208 | G | -0.0050 | 0.0005 | 2.70E-20 |  | 0.0084 | 0.0114 | 0.4637 |
|  | rs12320328 | 12 | 25408464 | A | 0.0042 | 0.0007 | 6.20E-10 |  | -0.0183 | 0.0154 | 0.2349 |
|  | rs11534749 | 12 | 26465512 | T | 0.0028 | 0.0005 | 3.00E-10 |  | -0.0083 | 0.0093 | 0.3701 |
|  | rs7966357 | 12 | 51209838 | C | 0.0029 | 0.0004 | 7.50E-13 |  | -0.0315 | 0.0086 | 0.0003 |
|  | rs1131017 | 12 | 56435929 | C | -0.0026 | 0.0004 | 2.90E-11 |  | 0.0163 | 0.0080 | 0.0424 |
|  | rs11837319 | 12 | 57053540 | C | 0.0029 | 0.0004 | 1.50E-11 |  | -0.0220 | 0.0089 | 0.0138 |
|  | rs3184504 | 12 | 111884608 | T | 0.0045 | 0.0004 | 5.80E-31 |  | -0.0187 | 0.0082 | 0.0218 |
|  | rs2686378 | 12 | 121614536 | G | -0.0031 | 0.0004 | 2.60E-14 |  | -0.0088 | 0.0083 | 0.2908 |
|  | rs36079122 | 12 | 122504220 | T | 0.0050 | 0.0004 | 7.80E-39 |  | -0.0046 | 0.0084 | 0.5846 |
|  | rs2851443 | 12 | 123694250 | C | -0.0038 | 0.0005 | 2.50E-18 |  | -0.0046 | 0.0094 | 0.6233 |
|  | rs2094496 | 13 | 27837415 | C | -0.0053 | 0.0008 | 7.10E-10 |  | 0.0015 | 0.0174 | 0.9304 |
|  | rs1778793 | 13 | 28444088 | C | 0.0032 | 0.0004 | 2.80E-16 |  | -0.0045 | 0.0086 | 0.6008 |
|  | rs7332115 | 13 | 33147548 | T | 0.0030 | 0.0004 | 4.70E-14 |  | 0.0088 | 0.0083 | 0.2896 |
|  | rs2812208 | 13 | 50707087 | G | 0.0103 | 0.0014 | 1.90E-14 |  | -0.0241 | 0.0261 | 0.3562 |
|  | rs7999034 | 13 | 111020878 | G | 0.0027 | 0.0004 | 7.60E-12 |  | 0.0067 | 0.0082 | 0.4160 |
|  | rs11621792 | 14 | 24871926 | C | -0.0036 | 0.0004 | 4.00E-19 |  | 0.0000 | 0.0086 | 0.9970 |
|  | rs12894146 | 14 | 35164549 | C | -0.0034 | 0.0004 | 9.90E-19 |  | 0.0008 | 0.0083 | 0.9261 |
|  | rs72683923 | 14 | 50735947 | T | 0.0144 | 0.0014 | 3.20E-25 |  | -0.0362 | 0.0351 | 0.3017 |
|  | rs12432645 | 14 | 69599483 | G | -0.0030 | 0.0004 | 4.80E-12 |  | 0.0089 | 0.0092 | 0.3322 |
|  | rs28929474 | 14 | 94844947 | C | -0.0231 | 0.0014 | 3.80E-63 |  | -0.1338 | 0.0302 | 9.61E-06 |
|  | rs3759584 | 14 | 103990799 | T | 0.0024 | 0.0004 | 1.10E-09 |  | -0.0002 | 0.0086 | 0.9799 |
|  | rs1382445 | 15 | 39820603 | G | -0.0041 | 0.0006 | 1.80E-10 |  | 0.0119 | 0.0144 | 0.4054 |
|  | rs8041057 | 15 | 40330629 | C | 0.0043 | 0.0004 | 1.40E-23 |  | 0.0109 | 0.0089 | 0.2175 |
|  | rs1077834 | 15 | 58723479 | T | 0.0036 | 0.0005 | 6.10E-14 |  | -0.0184 | 0.0097 | 0.0569 |
|  | rs339969 | 15 | 60883281 | C | -0.0038 | 0.0004 | 1.20E-22 |  | 0.0057 | 0.0084 | 0.5018 |
|  | rs55848327 | 15 | 63819427 | G | 0.0030 | 0.0005 | 3.00E-10 |  | -0.0054 | 0.0095 | 0.5714 |
|  | rs2127015 | 15 | 73985223 | T | -0.0038 | 0.0004 | 2.80E-22 |  | -0.0105 | 0.0082 | 0.1997 |
|  | rs7174367 | 15 | 79064667 | A | 0.0027 | 0.0004 | 2.30E-12 |  | 0.0112 | 0.0084 | 0.1799 |
|  | rs141117801 | 15 | 90341982 | C | 0.0062 | 0.0006 | 3.70E-22 |  | 0.0071 | 0.0156 | 0.6498 |
|  | rs76580947 | 16 | 3115325 | G | 0.0050 | 0.0007 | 5.20E-13 |  | -0.0080 | 0.0167 | 0.6341 |
|  | rs3794701 | 16 | 3730578 | A | -0.0024 | 0.0004 | 7.00E-10 |  | -0.0117 | 0.0085 | 0.1693 |
|  | rs56094641 | 16 | 53806453 | A | -0.0035 | 0.0004 | 1.50E-18 |  | 0.0155 | 0.0082 | 0.0574 |
|  | rs72784008 | 16 | 58102550 | C | 0.0032 | 0.0005 | 7.10E-13 |  | -0.0132 | 0.0096 | 0.1671 |
|  | rs246193 | 16 | 58547858 | C | 0.0028 | 0.0004 | 1.50E-12 |  | -0.0049 | 0.0084 | 0.5551 |
|  | rs62049035 | 16 | 70491655 | G | -0.0056 | 0.0008 | 6.00E-12 |  | 0.0414 | 0.0213 | 0.0525 |
|  | rs11649535 | 16 | 71591526 | A | -0.0032 | 0.0005 | 7.80E-10 |  | 0.0257 | 0.0109 | 0.0179 |
|  | rs217184 | 16 | 72105965 | T | 0.0047 | 0.0005 | 1.10E-22 |  | 0.0086 | 0.0101 | 0.3960 |
|  | rs4788460 | 16 | 72154509 | C | -0.0037 | 0.0004 | 6.20E-19 |  | -0.0079 | 0.0088 | 0.3703 |
|  | rs4575545 | 16 | 79755446 | G | -0.0028 | 0.0004 | 1.30E-11 |  | -0.0072 | 0.0087 | 0.4069 |
|  | rs28650012 | 16 | 80497341 | G | 0.0049 | 0.0004 | 3.40E-30 |  | -0.0130 | 0.0091 | 0.1523 |
|  | rs4782568 | 16 | 83980529 | C | 0.0044 | 0.0004 | 4.60E-30 |  | -0.0064 | 0.0091 | 0.4819 |
|  | rs117643180 | 17 | 7185779 | C | -0.0107 | 0.0012 | 4.20E-18 |  | 0.0307 | 0.0276 | 0.2661 |
|  | rs12450826 | 17 | 27164458 | A | 0.0028 | 0.0004 | 9.60E-11 |  | -0.0051 | 0.0091 | 0.5723 |
|  | rs17138478 | 17 | 36073320 | C | 0.0057 | 0.0006 | 4.90E-23 |  | 0.1195 | 0.0118 | 5.92E-24 |
|  | rs1801689 | 17 | 64210580 | A | -0.0145 | 0.0011 | 1.70E-39 |  | 0.0257 | 0.0243 | 0.2919 |
|  | rs7218014 | 17 | 65832016 | T | -0.0043 | 0.0005 | 2.10E-18 |  | 0.0293 | 0.0099 | 0.0030 |
|  | rs9904480 | 17 | 68454820 | C | 0.0027 | 0.0004 | 3.50E-12 |  | -0.0151 | 0.0080 | 0.0598 |
|  | rs9913936 | 17 | 70074148 | T | -0.0033 | 0.0004 | 1.60E-15 |  | 0.0174 | 0.0085 | 0.0407 |
|  | rs73352129 | 17 | 73778609 | C | 0.0029 | 0.0004 | 9.20E-12 |  | -0.0012 | 0.0095 | 0.9012 |
|  | rs3987888 | 17 | 75370274 | T | -0.0025 | 0.0004 | 3.20E-11 |  | -0.0081 | 0.0082 | 0.3238 |
|  | rs11657440 | 17 | 79480686 | T | -0.0046 | 0.0004 | 1.10E-32 |  | 0.0161 | 0.0082 | 0.0485 |
|  | rs12965052 | 18 | 45665900 | G | -0.0027 | 0.0004 | 2.20E-11 |  | 0.0061 | 0.0084 | 0.4657 |
|  | rs11543269 | 18 | 55313997 | C | 0.0068 | 0.0006 | 1.00E-30 |  | 0.0543 | 0.0123 | 0.0000 |
|  | rs4503880 | 18 | 56084054 | T | 0.0080 | 0.0005 | 4.20E-63 |  | -0.0130 | 0.0102 | 0.2009 |
|  | rs77707292 | 18 | 56099855 | T | 0.0060 | 0.0007 | 1.80E-17 |  | -0.0164 | 0.0160 | 0.3050 |
|  | rs12454712 | 18 | 60845884 | T | 0.0032 | 0.0004 | 9.50E-16 |  | 0.0012 | 0.0082 | 0.8872 |
|  | rs123698 | 19 | 807442 | G | -0.0026 | 0.0004 | 2.20E-10 |  | 0.0116 | 0.0099 | 0.2375 |
|  | rs12609548 | 19 | 3753656 | T | 0.0024 | 0.0004 | 4.00E-10 |  | -0.0056 | 0.0082 | 0.4915 |
|  | rs4804414 | 19 | 7223785 | C | -0.0024 | 0.0004 | 1.10E-09 |  | 0.0041 | 0.0084 | 0.6259 |
|  | rs554146 | 19 | 7962429 | A | 0.0032 | 0.0004 | 1.40E-13 |  | -0.0182 | 0.0089 | 0.0409 |
|  | rs10409243 | 19 | 10332988 | C | 0.0037 | 0.0004 | 2.70E-20 |  | 0.0214 | 0.0083 | 0.0095 |
|  | rs11086006 | 19 | 15986388 | G | 0.0028 | 0.0004 | 1.30E-12 |  | 0.0025 | 0.0086 | 0.7717 |
|  | rs12984126 | 19 | 17842620 | A | -0.0026 | 0.0004 | 1.30E-12 |  | -0.0016 | 0.0083 | 0.8441 |
|  | rs11666906 | 19 | 18241898 | A | -0.0048 | 0.0004 | 4.30E-28 |  | -0.0161 | 0.0091 | 0.0780 |
|  | rs58542926 | 19 | 19379549 | C | -0.0171 | 0.0007 | 1.80E-119 |  | 0.0063 | 0.0151 | 0.6740 |
|  | rs188247550 | 19 | 19396616 | C | -0.0190 | 0.0018 | 8.70E-27 |  | -0.0607 | 0.0478 | 0.2040 |
|  | rs75916629 | 19 | 20213781 | A | -0.0092 | 0.0013 | 2.40E-12 |  | 0.0098 | 0.0267 | 0.7129 |
|  | rs7247349 | 19 | 33887160 | A | 0.0038 | 0.0004 | 2.70E-22 |  | -0.0079 | 0.0082 | 0.3358 |
|  | rs7599 | 19 | 36038390 | A | 0.0033 | 0.0004 | 2.00E-16 |  | -0.0081 | 0.0085 | 0.3423 |
|  | rs3786876 | 19 | 38759103 | T | -0.0032 | 0.0005 | 6.00E-09 |  | 0.0598 | 0.0115 | 1.83E-07 |
|  | rs56113850 | 19 | 41353107 | T | -0.0031 | 0.0004 | 1.40E-15 |  | 0.0104 | 0.0091 | 0.2526 |
|  | rs429358 | 19 | 45411941 | T | 0.0085 | 0.0005 | 1.10E-56 |  | 0.0374 | 0.0117 | 0.0014 |
|  | rs10402747 | 19 | 45815248 | T | -0.0027 | 0.0004 | 1.70E-12 |  | -0.0036 | 0.0082 | 0.6631 |
|  | rs4806498 | 19 | 54674742 | C | -0.0024 | 0.0004 | 1.60E-09 |  | -0.0155 | 0.0085 | 0.0673 |
|  | rs117652816 | 20 | 10577881 | G | 0.0067 | 0.0011 | 5.90E-10 |  | -0.0058 | 0.0240 | 0.8100 |
|  | rs438568 | 20 | 12958687 | A | 0.0035 | 0.0004 | 1.10E-18 |  | 0.0000 | 0.0087 | 0.9967 |
|  | rs364585 | 20 | 12962718 | A | 0.0035 | 0.0004 | 1.10E-18 |  | 0.0004 | 0.0087 | 0.9665 |
|  | rs6135225 | 20 | 14678135 | G | -0.0031 | 0.0004 | 3.50E-13 |  | -0.0095 | 0.0088 | 0.2766 |
|  | rs2618567 | 20 | 17844492 | G | -0.0028 | 0.0004 | 3.00E-11 |  | 0.0114 | 0.0094 | 0.2237 |
|  | rs4815429 | 20 | 25521611 | T | 0.0024 | 0.0004 | 2.40E-10 |  | -0.0274 | 0.0079 | 0.0005 |
|  | rs13042148 | 20 | 32298286 | C | -0.0046 | 0.0005 | 1.10E-17 |  | -0.0394 | 0.0113 | 0.0005 |
|  | rs819140 | 20 | 32915754 | A | 0.0034 | 0.0004 | 1.60E-19 |  | -0.0118 | 0.0079 | 0.1368 |
|  | rs6120772 | 20 | 33554761 | C | -0.0044 | 0.0005 | 2.30E-19 |  | -0.0260 | 0.0100 | 0.0091 |
|  | rs1883711 | 20 | 39179822 | G | -0.0092 | 0.0011 | 8.60E-17 |  | 0.0557 | 0.0249 | 0.0255 |
|  | rs8114057 | 20 | 43036452 | G | 0.0025 | 0.0004 | 2.00E-10 |  | -0.0054 | 0.0082 | 0.5149 |
|  | rs1412957 | 20 | 45557065 | A | -0.0025 | 0.0004 | 2.10E-10 |  | 0.0029 | 0.0084 | 0.7336 |
|  | rs73613564 | 20 | 60906055 | C | 0.0026 | 0.0004 | 1.30E-10 |  | -0.0077 | 0.0084 | 0.3564 |
|  | rs1741706 | 20 | 62347187 | G | -0.0042 | 0.0007 | 9.60E-10 |  | 0.0281 | 0.0153 | 0.0670 |
|  | rs2229742 | 21 | 16339172 | G | -0.0045 | 0.0006 | 2.90E-12 |  | 0.0046 | 0.0140 | 0.7407 |
|  | rs1236433 | 21 | 30017560 | C | 0.0049 | 0.0007 | 7.60E-12 |  | 0.0227 | 0.0140 | 0.1052 |
|  | rs1882862 | 21 | 30582683 | C | -0.0042 | 0.0006 | 6.00E-12 |  | -0.0150 | 0.0118 | 0.2034 |
|  | rs570805211 | 21 | 40290624 | C | -0.0026 | 0.0004 | 7.70E-11 |  | -0.0360 | 0.0083 | 1.50E-05 |
|  | rs76464837 | 21 | 40632347 | T | 0.0043 | 0.0006 | 3.60E-13 |  | -0.0177 | 0.0130 | 0.1731 |
|  | rs235314 | 21 | 46271452 | C | 0.0032 | 0.0004 | 5.40E-17 |  | -0.0133 | 0.0080 | 0.0965 |
|  | rs12484324 | 22 | 24296294 | T | 0.0026 | 0.0004 | 1.30E-10 |  | -0.0159 | 0.0084 | 0.0567 |
|  | rs5752776 | 22 | 29108229 | A | -0.0042 | 0.0004 | 8.50E-25 |  | -0.0066 | 0.0087 | 0.4454 |
|  | rs132642 | 22 | 36545137 | A | -0.0085 | 0.0005 | 5.50E-60 |  | -0.0010 | 0.0109 | 0.9307 |
|  | rs2267372 | 22 | 38598234 | A | -0.0033 | 0.0004 | 3.60E-17 |  | -0.0161 | 0.0082 | 0.0502 |
|  | rs738409 | 22 | 44324727 | C | -0.0213 | 0.0005 | 1.00E-300 |  | 0.0220 | 0.0100 | 0.0275 |
|  | rs7292268 | 22 | 50839797 | G | -0.0027 | 0.0005 | 5.20E-10 |  | 0.0161 | 0.0094 | 0.0850 |

| **Supplementary Table 4**. Variances explained by the selected instruments, F-statistics and power calculations for Mendelian randomization analyses among European populations. | | | | |
| --- | --- | --- | --- | --- |
| Exposure | No. of SNPs | Variance explained (R2) | F-statistic, median (range) | Power |
| Alanine | 16 | 0.117 | 41.65 (30.41-125.28) | 1.000 |
| Arginine | 9 | 0.071 | 49.41 (32.10-214.82) | 0.558 |
| Aspartate | 3 | 0.065 | 145.14 (48.71-328.10) | 0.046 |
| Glutamine | 10 | 0.124 | 74.62 (40.87-904.64) | 0.956 |
| Glycine | 15 | 0.069 | 44.43 (35.99-158.17) | 0.031 |
| Histidine | 8 | 0.006 | 70.20 (43.20-536.75) | 0.116 |
| Isoleucine | 4 | 0.029 | 58.85 (32.54-79.52) | 0.575 |
| Leucine | 6 | 0.047 | 64.54 (37.69-75.65) | 0.738 |
| Lysine | 9 | 0.088 | 49.16 (37.42-356.50) | 0.660 |
| Methionine | 1 | 0.006 | 43.71 | 0.195 |
| Phenylalanine | 7 | 0.046 | 117.94 (40.44-195.45) | 0.035 |
| Proline | 3 | 0.126 | 40.68 (34.21-1035.80) | 0.117 |
| Serine | 5 | 0.072 | 236.48 (61.47-284.82) | 0.100 |
| Threonine | 7 | 0.028 | 47.05 (39.96-54.15) | 0.389 |
| Tryptophan | 2 | 0.028 | 109.65 (87.39-131.91) | 0.389 |
| Tyrosine | 6 | 0.039 | 58.89 (34.95-379.54) | 0.738 |
| Valine | 6 | 0.024 | 78.68 (47.13-205.05) | 0.167 |
| ALT | 237 | 0.058 | 87.45 (40.61-254.71) | 1.000 |

| **Supplementary Table 5**. Pleiotropic associations of the SNPs used as instrumental variables for Alanine aminotransferase. | | | | |
| --- | --- | --- | --- | --- |
| SNP | Location | Trait(s) | *P*-value | PubMed ID |
| rs56094641 | 16:53772541 | body height | 4.00E-243 | 32376654 |
|  |  | C-reactive protein measurement | 2.00E-26 | 31900758 |
|  |  | diet measurement | 1.00E-19 | 32066663 |
|  |  | Drugs used in diabetes use measurement | 2.00E-23 | 31015401 |
|  |  | Diuretic use measurement | 7.00E-14 | 31015401 |
|  |  | visceral adipose tissue measurement | 4.00E-145 | 31501611 |
|  |  | metabolic syndrome | 1.00E-28 | 31589552 |
|  |  | neck circumference | 1.00E-09 | 33907307 |
|  |  | type 2 diabetes mellitus | 2.00E-64 | 34594039 |
|  |  | Drugs used in diabetes use measurement | 1.00E-39 | 34594039 |
|  |  | Beta blocking agent use measurement | 2.00E-11 | 34594039 |
|  |  | Calcium channel blocker use measurement | 2.00E-16 | 34594039 |
|  |  | mean corpuscular hemoglobin | 2.00E-11 | 30595370 |
|  |  | diabetic nephropathy | 8.00E-10 | 30566433 |
|  |  | Moderate albuminuria, diabetic nephropathy | 2.00E-09 | 30566433 |
|  |  | heart failure | 1.00E-08 | 31919418 |
|  |  | obesity | 6.00E-25 | 31504550 |
| rs246193 | 16:58513954 | autism spectrum disorder, schizophrenia | 1.00E-08 | 33686288 |
| rs62049035 | 16:70457752 | pulse pressure measurement | 9.00E-31 | 30578418 |
|  |  | diastolic blood pressure | 2.00E-14 | 30578418 |
| rs4575545 | 16:79721549 | platelet count | 4.00E-32 | 32888493 |
|  |  | vitamin D measurement | 3.00E-13 | 32242144 |
|  |  | urate measurement | 9.00E-37 | 33356394 |
|  |  | alkaline phosphatase measurement | 6.00E-114 | 33972514 |
|  |  | uric acid measurement | 2.00E-43 | 34594039 |
|  |  | platelet count | 5.00E-21 | 34594039 |
|  |  | tyrosine measurement | 4.00E-09 | 35213538 |
|  |  | age at menopause | 4.00E-09 | 30595370 |
| rs1801689 | 17:66214462 | low density lipoprotein cholesterol measurement | 1.00E-30 | 32154731 |
|  |  | triglyceride measurement | 2.00E-30 | 32203549 |
|  |  | platelet count | 2.00E-81 | 32888493 |
|  |  | sex hormone-binding globulin measurement | 3.00E-60 | 32042192 |
|  |  | blood protein measurement | 1.00E-49 | 29875488 |
|  |  | Dickkopf-related protein 4 measurement | 7.00E-10 | 28240269 |
|  |  | NAD-dependent protein deacetylase sirtuin-2 measurement | 3.00E-19 | 28240269 |
|  |  | lipoprotein A measurement | 5.00E-56 | 33730874 |
|  |  | apolipoprotein B measurement | 1.00E-40 | 33462484 |
|  |  | IGF-1 measurement | 2.00E-34 | 33462484 |
|  |  | total cholesterol measurement | 3.00E-25 | 33462484 |
|  |  | aspartate aminotransferase to alanine aminotransferase ratio | 8.00E-20 | 33462484 |
|  |  | triglyceride measurement, very low-density lipoprotein cholesterol measurement | 4.00E-24 | 35213538 |
|  |  | very low-density lipoprotein cholesterol measurement, phospholipid measurement | 1.00E-14 | 35213538 |
|  |  | cholesteryl ester measurement, chylomicron measurement, very low-density lipoprotein cholesterol measurement | 3.00E-15 | 35213538 |
|  |  | free cholesterol measurement, chylomicron measurement, very low-density lipoprotein cholesterol measurement | 1.00E-21 | 35213538 |
|  |  | total cholesterol measurement, intermediate density lipoprotein measurement | 5.00E-11 | 35213538 |
|  |  | very low-density lipoprotein cholesterol measurement, lipid measurement | 3.00E-18 | 35213538 |
|  |  | very low-density lipoprotein cholesterol measurement | 1.00E-15 | 35213538 |
|  |  | cholesteryl ester measurement, very low-density lipoprotein cholesterol measurement | 4.00E-13 | 35213538 |
|  |  | chylomicron measurement, very low-density lipoprotein cholesterol measurement | 1.00E-23 | 35213538 |
|  |  | chylomicron measurement, very low-density lipoprotein cholesterol measurement, lipid measurement | 7.00E-28 | 35213538 |
|  |  | chylomicron measurement, triglyceride measurement, very low-density lipoprotein cholesterol measurement | 2.00E-33 | 35213538 |
|  |  | chylomicron measurement, very low-density lipoprotein cholesterol measurement, lipid or lipoprotein measurement | 4.00E-36 | 35213538 |
|  |  | free cholesterol measurement, very low-density lipoprotein cholesterol measurement | 5.00E-13 | 35213538 |
|  |  | chylomicron measurement, total cholesterol measurement, very low-density lipoprotein cholesterol measurement | 2.00E-18 | 35213538 |
|  |  | chylomicron measurement, very low-density lipoprotein cholesterol measurement, phospholipid measurement | 6.00E-22 | 35213538 |
|  |  | glycoprotein measurement | 8.00E-10 | 35213538 |
|  |  | low density lipoprotein cholesterol measurement, lipid or lipoprotein measurement | 1.00E-15 | 35213538 |
|  |  | cholesteryl ester measurement, intermediate density lipoprotein measurement | 5.00E-10 | 35213538 |
|  |  | very low-density lipoprotein cholesterol measurement, lipid or lipoprotein measurement | 8.00E-44 | 35213538 |
|  |  | free cholesterol measurement, intermediate density lipoprotein measurement | 1.00E-13 | 35213538 |
|  |  | fatty acid measurement | 5.00E-10 | 35213538 |
|  |  | lipid or lipoprotein measurement, high density lipoprotein cholesterol measurement | 1.00E-08 | 35213538 |
|  |  | very low-density lipoprotein particle size measurement | 6.00E-37 | 35213538 |
|  |  | triglyceride measurement, phospholipid measurement | 1.00E-18 | 35213538 |
|  |  | total cholesterol measurement, high density lipoprotein cholesterol measurement | 5.00E-09 | 35213538 |
|  |  | cholesteryl ester measurement, high density lipoprotein cholesterol measurement | 3.00E-08 | 35213538 |
|  |  | free cholesterol measurement, high density lipoprotein cholesterol measurement | 1.00E-10 | 35213538 |
|  |  | aspartate aminotransferase measurement | 1.00E-21 | 33462484 |
|  |  | C-reactive protein measurement | 2.00E-16 | 33462484 |
|  |  | low density lipoprotein particle size measurement | 3.00E-15 | 35213538 |
| rs7218014 | 17:67835900 | body mass index | 7.00E-15 | 30595370 |
| rs73352129 | 17:75782528 | low density lipoprotein cholesterol measurement | 1.00E-13 | 32154731 |
|  |  | sex hormone-binding globulin measurement | 4.00E-33 | 32042192 |
| rs3987888 | 17:77374192 | neutrophil percentage of leukocytes | 6.00E-09 | 32888494 |
| rs58542926 | 19:19268740 | sleep duration, triglyceride measurement | 5.00E-32 | 31719535 |
|  |  | triglyceride measurement | 1.00E-162 | 32203549 |
|  |  | type 2 diabetes mellitus | 5.00E-25 | 32541925 |
|  |  | C-reactive protein measurement | 1.00E-25 | 31900758 |
|  |  | hematocrit | 1.00E-18 | 32888493 |
|  |  | hemoglobin measurement | 1.00E-15 | 32888493 |
|  |  | HMG CoA reductase inhibitor use measurement | 2.00E-31 | 31015401 |
|  |  | diacylglycerol 38:5 measurement | 4.00E-12 | 34503513 |
|  |  | serum albumin measurement | 3.00E-16 | 33462484 |
|  |  | alkaline phosphatase measurement | 7.00E-95 | 33462484 |
|  |  | apolipoprotein B measurement | 1.00E-161 | 33462484 |
|  |  | calcium measurement | 1.00E-12 | 33462484 |
|  |  | aspartate aminotransferase to alanine aminotransferase ratio | 7.00E-60 | 33462484 |
|  |  | creatinine measurement | 2.00E-12 | 33462484 |
|  |  | glomerular filtration rate | 9.00E-12 | 33462484 |
|  |  | bilirubin measurement | 5.00E-43 | 33462484 |
|  |  | total cholesterol measurement | 6.00E-259 | 33462484 |
|  |  | low density lipoprotein cholesterol measurement | 3.00E-228 | 33462484 |
|  |  | linoleic acid measurement | 5.00E-46 | 35213538 |
|  |  | esterified cholesterol measurement | 9.00E-35 | 35213538 |
|  |  | free cholesterol measurement | 9.00E-47 | 35213538 |
|  |  | total cholesterol measurement, intermediate density lipoprotein measurement | 3.00E-27 | 35213538 |
|  |  | docosahexaenoic acid measurement | 1.00E-57 | 35213538 |
|  |  | docosahexaenoic acid measurement, fatty acid measurement | 9.00E-09 | 35213538 |
|  |  | glycoprotein measurement | 3.00E-13 | 35213538 |
|  |  | polyunsaturated fatty acid measurement | 4.00E-89 | 35213538 |
|  |  | cholesteryl ester measurement, low-density lipoprotein cholesterol measurement | 2.00E-49 | 35213538 |
|  |  | free cholesterol measurement, low-density lipoprotein cholesterol measurement | 2.00E-27 | 35213538 |
|  |  | low density lipoprotein cholesterol measurement, lipid measurement | 1.00E-45 | 35213538 |
|  |  | low density lipoprotein cholesterol measurement, phospholipid measurement | 2.00E-44 | 35213538 |
|  |  | very low-density lipoprotein cholesterol measurement, lipid measurement | 5.00E-72 | 35213538 |
|  |  | very low-density lipoprotein cholesterol measurement | 2.00E-66 | 35213538 |
|  |  | cholesteryl ester measurement, very low-density lipoprotein cholesterol measurement | 9.00E-65 | 35213538 |
|  |  | free cholesterol measurement, intermediate density lipoprotein measurement | 2.00E-20 | 35213538 |
|  |  | total cholesterol measurement, very low-density lipoprotein cholesterol measurement | 9.00E-63 | 35213538 |
|  |  | very low-density lipoprotein cholesterol measurement, phospholipid measurement | 8.00E-65 | 35213538 |
|  |  | triglyceride measurement, very low-density lipoprotein cholesterol measurement | 5.00E-66 | 35213538 |
|  |  | omega-3 polyunsaturated fatty acid measurement | 3.00E-116 | 35213538 |
|  |  | fatty acid measurement | 4.00E-81 | 35213538 |
|  |  | omega-6 polyunsaturated fatty acid measurement | 1.00E-62 | 35213538 |
|  |  | total cholesterol measurement, high density lipoprotein cholesterol measurement | 3.00E-21 | 35213538 |
|  |  | remnant cholesterol measurement | 1.00E-51 | 35213538 |
|  |  | cholesteryl ester measurement, high density lipoprotein cholesterol measurement | 5.00E-18 | 35213538 |
|  |  | free cholesterol measurement, high density lipoprotein cholesterol measurement | 1.00E-25 | 35213538 |
|  |  | lipid measurement, high density lipoprotein cholesterol measurement | 2.00E-29 | 35213538 |
|  |  | high density lipoprotein cholesterol measurement | 1.00E-26 | 35213538 |
|  |  | phospholipid measurement, high density lipoprotein cholesterol measurement | 3.00E-28 | 35213538 |
|  |  | total cholesterol measurement, low-density lipoprotein cholesterol measurement | 3.00E-45 | 35213538 |
|  |  | low density lipoprotein cholesterol measurement, lipid or lipoprotein measurement | 6.00E-48 | 35213538 |
|  |  | lipid or lipoprotein measurement, high density lipoprotein cholesterol measurement | 3.00E-19 | 35213538 |
|  |  | lipid measurement, lipoprotein measurement | 4.00E-60 | 35213538 |
|  |  | lipoprotein measurement, phospholipid measurement | 2.00E-45 | 35213538 |
|  |  | sphingomyelin measurement | 2.00E-18 | 35213538 |
|  |  | free cholesterol measurement, very low-density lipoprotein cholesterol measurement | 2.00E-62 | 35213538 |
|  |  | vitamin measurement, alpha-tocopherol measurement | 1.00E-08 | 23696881 |
|  |  | non-alcoholic fatty liver disease | 7.00E-17 | 34841290 |
|  |  | triglyceride measurement, physical activity | 3.00E-72 | 30670697 |
|  |  | liver fat measurement, liver disease biomarker | 6.00E-37 | 32247823 |
|  |  | cirrhosis of liver | 3.00E-83 | 33310085 |
|  |  | liver fat measurement | 2.00E-116 | 34128465 |
|  |  | aspartate aminotransferase measurement | 1.00E-45 | 33462484 |
|  |  | cystatin C measurement | 4.00E-10 | 33462484 |
|  |  | vitamin D measurement | 2.00E-22 | 33462484 |
|  |  | BMI-adjusted waist-hip ratio | 4.00E-08 | 34021172 |
|  |  | hepatocellular carcinoma | 6.00E-10 | 34902334 |
|  |  | proprotein convertase subtilisin/kexin type 9 measurement | 4.00E-08 | 34590679 |
|  |  | cholesteryl ester measurement, intermediate density lipoprotein measurement | 2.00E-29 | 35213538 |
|  |  | lipid measurement, intermediate density lipoprotein measurement | 7.00E-31 | 35213538 |
|  |  | phospholipid measurement, intermediate density lipoprotein measurement | 5.00E-30 | 35213538 |
|  |  | intermediate density lipoprotein measurement | 1.00E-34 | 35213538 |
| rs188247550 | 19:19285807 | platelet count | 2.00E-09 | 32888494 |
|  |  | low density lipoprotein cholesterol measurement | 9.00E-37 | 32203549 |
|  |  | liver fat measurement | 1.00E-26 | 34128465 |
|  |  | liver neoplasm | 3.00E-12 | 34594039 |
|  |  | triglyceride measurement | 2.00E-48 | 32203549 |
|  |  | apolipoprotein B measurement | 2.00E-28 | 32203549 |
| rs75916629 | 19:20102972 | alkaline phosphatase measurement | 5.00E-20 | 33972514 |
| rs10402747 | 19:45311990 | cognitive function measurement | 5.00E-09 | 30038396 |
|  |  | self-reported educational attainment | 2.00E-09 | 30038396 |
| rs4806498 | 19:54171009 | diacylglycerol 38:3 measurement | 2.00E-25 | 34503513 |
|  |  | phosphatide measurement | 2.00E-11 | 34503513 |
|  |  | diacylglycerol 38:4 measurement | 3.00E-46 | 34503513 |
|  |  | phosphatidylinositol measurement | 4.00E-59 | 34503513 |
| rs429358 | 19:44908684 | sleep duration, high density lipoprotein cholesterol measurement | 4.00E-37 | 31719535 |
|  |  | high density lipoprotein cholesterol measurement | 7.00E-180 | 32203549 |
|  |  | myocardial infarction | 4.00E-22 | 33532862 |
|  |  | adult-onset asthma, type 2 diabetes mellitus | 2.00E-10 | 31669095 |
|  |  | BMI-adjusted waist-hip ratio | 3.00E-19 | 31669095 |
|  |  | insomnia measurement | 2.00E-08 | 30804565 |
|  |  | Abdominal Aortic Aneurysm | 1.00E-15 | 32981348 |
|  |  | red blood cell distribution width | 2.00E-59 | 32888494 |
|  |  | cerebral amyloid deposition measurement | 3.00E-50 | 29860282 |
|  |  | Alzheimer's disease biomarker measurement | 4.00E-33 | 29860282 |
|  |  | mean corpuscular volume | 2.00E-46 | 32888494 |
|  |  | platelet count | 4.00E-21 | 32888494 |
|  |  | longevity | 1.00E-61 | 31413261 |
|  |  | atrophic macular degeneration, age-related macular degeneration, wet macular degeneration | 2.00E-42 | 26691988 |
|  |  | triglyceride measurement | 1.00E-39 | 29507422 |
|  |  | total cholesterol measurement | 1.00E-145 | 29507422 |
|  |  | neurofibrillary tangles measurement | 3.00E-31 | 31497858 |
|  |  | neuritis plaque measurement | 9.00E-25 | 31497858 |
|  |  | late-onset Alzheimer’s disease | 1.00E-300 | 34493870 |
|  |  | alkaline phosphatase measurement | 8.00E-40 | 33972514 |
|  |  | Alzheimer disease, age at onset | 4E-497 | 33637690 |
|  |  | very low-density lipoprotein cholesterol measurement, lipid or lipoprotein measurement | 1.00E-76 | 35213538 |
|  |  | 3-hydroxybutyrate measurement | 2.00E-23 | 35213538 |
|  |  | total cholesterol measurement, high density lipoprotein cholesterol measurement | 2.00E-45 | 35213538 |
|  |  | cholesteryl ester measurement, high density lipoprotein cholesterol measurement | 2.00E-50 | 35213538 |
|  |  | triglyceride measurement, low-density lipoprotein cholesterol measurement | 1.00E-64 | 35213538 |
|  |  | uric acid measurement | 6.00E-13 | 34594039 |
|  |  | creatinine measurement | 5.00E-28 | 34594039 |
|  |  | low density lipoprotein cholesterol measurement, lipid or lipoprotein measurement | 5.00E-54 | 35213538 |
|  |  | cortical thickness | 5.00E-12 | 34910505 |
|  |  | Abnormality of refraction | 3.00E-17 | 32231278 |
|  |  | Alzheimer disease, family history of Alzheimer’s disease | 1.00E-300 | 33589840 |
|  |  | amyloid-beta measurement | 4.00E-33 | 33223526 |
|  |  | type 2 diabetes mellitus | 4.00E-28 | 32541925 |
|  |  | health study participation | 1.00E-20 | 33563987 |
|  |  | body height | 3.00E-17 | 32376654 |
|  |  | mean reticulocyte volume | 4.00E-21 | 32888494 |
|  |  | chylomicron measurement, very low-density lipoprotein cholesterol measurement, esterified cholesterol measurement | 7.00E-09 | 34610981 |
|  |  | very low-density lipoprotein cholesterol measurement, esterified cholesterol measurement | 1.00E-21 | 34610981 |
|  |  | very low-density lipoprotein cholesterol measurement | 3.00E-21 | 34610981 |
|  |  | very low-density lipoprotein cholesterol measurement, phospholipid measurement | 1.00E-19 | 34610981 |
|  |  | free cholesterol measurement, very low-density lipoprotein cholesterol measurement | 2.00E-18 | 34610981 |
|  |  | very low-density lipoprotein cholesterol measurement, lipid measurement | 2.00E-21 | 34610981 |
|  |  | apolipoprotein B measurement | 6.00E-26 | 34610981 |
|  |  | total cholesterol measurement, low-density lipoprotein cholesterol measurement | 1.00E-25 | 34610981 |
|  |  | diffuse plaque measurement | 1.00E-20 | 28322283 |
|  |  | refractive error | 4.00E-08 | 32352494 |
|  |  | C-reactive protein measurement | 2.00E-1953 | 31900758 |
|  |  | intermediate density lipoprotein measurement | 2.00E-24 | 34610981 |
|  |  | esterified cholesterol measurement, intermediate density lipoprotein measurement | 8.00E-26 | 34610981 |
|  |  | triglyceride measurement, intermediate density lipoprotein measurement | 1.00E-12 | 34610981 |
|  |  | linoleic acid measurement | 3.00E-22 | 34610981 |
|  |  | free cholesterol measurement, intermediate density lipoprotein measurement | 5.00E-20 | 34610981 |
|  |  | lipid measurement, intermediate density lipoprotein measurement | 6.00E-23 | 34610981 |
|  |  | phospholipid measurement, intermediate density lipoprotein measurement | 4.00E-21 | 34610981 |
|  |  | low density lipoprotein cholesterol measurement, phospholipid measurement | 2.00E-28 | 34610981 |
|  |  | free cholesterol measurement, low-density lipoprotein cholesterol measurement | 4.00E-27 | 34610981 |
|  |  | low density lipoprotein cholesterol measurement, lipid measurement | 7.00E-27 | 34610981 |
|  |  | low density lipoprotein triglyceride measurement | 4.00E-14 | 34610981 |
|  |  | fatty acid measurement | 4.00E-17 | 34610981 |
|  |  | esterified cholesterol measurement | 2.00E-22 | 34610981 |
|  |  | omega-6 polyunsaturated fatty acid measurement | 1.00E-20 | 34610981 |
|  |  | free cholesterol measurement | 9.00E-18 | 34610981 |
|  |  | esterified cholesterol measurement, low-density lipoprotein cholesterol measurement | 3.00E-26 | 34610981 |
|  |  | polyunsaturated fatty acid measurement | 3.00E-20 | 34610981 |
|  |  | apolipoprotein A 1 measurement | 8E-311 | 32203549 |
|  |  | brain infarction, neuritis plaque measurement, Lewy body dementia, cerebral amyloid angiopathy, neurofibrillary tangles measurement | 3.00E-33 | 28322283 |
|  |  | cerebral amyloid angiopathy | 5.00E-25 | 28322283 |
|  |  | triglyceride measurement, high density lipoprotein cholesterol measurement | 9.00E-13 | 34610981 |
|  |  | longevity, health span, parental longevity | 1.00E-126 | 32678081 |
|  |  | liver fat measurement, liver disease biomarker | 6.00E-11 | 32247823 |
|  |  | parental longevity | 3.00E-83 | 30642433 |
|  |  | Parkinson disease, disease progression measurement | 3.00E-13 | 33111402 |
|  |  | total cholesterol measurement, very low-density lipoprotein cholesterol measurement | 7.00E-17 | 34610981 |
|  |  | esterified cholesterol measurement, high density lipoprotein cholesterol measurement | 2.00E-10 | 34610981 |
|  |  | free cholesterol measurement, high density lipoprotein cholesterol measurement | 1.00E-08 | 34610981 |
|  |  | lipid measurement, high density lipoprotein cholesterol measurement | 1.00E-09 | 34610981 |
|  |  | phospholipid measurement, high density lipoprotein cholesterol measurement | 6.00E-17 | 34610981 |
|  |  | white matter hyperintensity measurement | 1.00E-09 | 32358547 |
|  |  | diet measurement | 5.00E-13 | 32066663 |
|  |  | neuroimaging measurement | 1.00E-09 | 20100581 |
|  |  | platelet crit | 6.00E-31 | 32888494 |
|  |  | sugar consumption measurement | 3.00E-11 | 32393786 |
|  |  | Lewy body dementia | 3.00E-64 | 29263008 |
|  |  | mortality | 1.00E-20 | 27029810 |
|  |  | Mental deterioration | 2.00E-14 | 28078323 |
|  |  | physical activity measurement | 6.00E-13 | 29899525 |
|  |  | Alzheimer disease, amyloid-beta measurement | 5.00E-14 | 23419831 |
|  |  | low density lipoprotein cholesterol measurement | 3.00E-187 | 29507422 |
|  |  | beta-amyloid 1-42 measurement | 1.00E-51 | 29274321 |
|  |  | t-tau measurement | 1.00E-20 | 29274321 |
|  |  | hippocampal volume | 2.00E-19 | 29274321 |
|  |  | memory performance | 2.00E-18 | 29274321 |
|  |  | Alzheimer disease, vascular dementia | 6.00E-14 | 31473137 |
|  |  | waist-hip ratio | 4.00E-37 | 30239722 |
|  |  | Alzheimer disease | 2.00E-303 | 31473137 |
|  |  | apolipoprotein E measurement | 2.00E-12 | 28240269 |
|  |  | neuritis plaque measurement, neurofibrillary tangles measurement | 3.00E-47 | 29458411 |
|  |  | neuritis plaque measurement, cerebral amyloid angiopathy | 5.00E-40 | 29458411 |
|  |  | cerebral amyloid angiopathy, neurofibrillary tangles measurement | 6.00E-35 | 29458411 |
|  |  | Lewy body dementia, Lewy body dementia measurement | 1.00E-12 | 25188341 |
|  |  | p-tau measurement | 3.00E-25 | 34119372 |
|  |  | plasma beta-amyloid 1-42 measurement | 9.00E-13 | 34002480 |
|  |  | plasma beta-amyloid 1-40:1-42 ratio measurement | 6.00E-20 | 34002480 |
|  |  | vitamin D measurement | 1.00E-15 | 32242144 |
|  |  | matrix metalloproteinase–degraded type I collagen measurement | 1.00E-17 | 33134509 |
|  |  | executive function measurement | 2.00E-13 | 32895543 |
|  |  | information processing speed | 2.00E-18 | 32895543 |
|  |  | liver fat measurement | 1.00E-30 | 34128465 |
|  |  | non-alcoholic fatty liver disease | 3.00E-13 | 34535985 |
|  |  | blood protein measurement | 5.00E-646 | 29875488 |
|  |  | angina pectoris | 1.00E-16 | 34594039 |
| rs438568 | 20:12978039 | low density lipoprotein cholesterol measurement | 7.00E-16 | 32493714 |
|  |  | sphingolipid measurement | 8.00E-21 | 31628463 |
|  |  | sphingomyelin measurement | 7.00E-18 | 31628463 |
|  |  | osteocalcin measurement | 1.00E-11 | 34503513 |
|  |  | genotoxic compound exposure measurement | 1.00E-11 | 34503513 |
|  |  | phosphatidylcholine measurement | 1.00E-11 | 34503513 |
|  |  | lipid or lipoprotein measurement, intermediate density lipoprotein measurement | 7.00E-09 | 35213538 |
|  |  | low density lipoprotein cholesterol measurement, lipid or lipoprotein measurement | 1.00E-08 | 35213538 |
|  |  | very low-density lipoprotein cholesterol measurement, lipid or lipoprotein measurement | 5.00E-09 | 35213538 |
|  |  | ceramide measurement | 4.00E-29 | 33437986 |
| rs6135225 | 20:14697489 | receptor-type tyrosine-protein kinase flt3 measurement | 2.00E-290 | 35078996 |
| rs13042148 | 20:33710480 | sex hormone-binding globulin measurement | 9.00E-39 | 32042192 |
|  |  | diastolic blood pressure | 7.00E-12 | 30224653 |
| rs235314 | 21:44851537 | apolipoprotein A 1 measurement | 2.00E-27 | 32203549 |
|  |  | HDL cholesterol change measurement, physical activity | 2.00E-09 | 30670697 |
|  |  | alcohol consumption measurement, high density lipoprotein cholesterol measurement | 3.00E-16 | 30698716 |
|  |  | alcohol drinking, high density lipoprotein cholesterol measurement | 2.00E-18 | 30698716 |
|  |  | serum gamma-glutamyl transferase measurement | 7.00E-38 | 33972514 |
|  |  | lipid measurement, high density lipoprotein cholesterol measurement | 4.00E-08 | 35213538 |
|  |  | phospholipid measurement, high density lipoprotein cholesterol measurement | 4.00E-08 | 35213538 |
|  |  | high density lipoprotein cholesterol measurement | 1.00E-24 | 34594039 |
| rs2267372 | 22:38202227 | glomerular filtration rate | 5.00E-21 | 31152163 |
| rs7292268 | 22:50401368 | blood protein measurement | 2.00E-216 | 30072576 |
| rs12140153 | 1:62114219 | type 2 diabetes mellitus | 1.00E-08 | 30297969 |
|  |  | comparative body size at age 10, self-reported | 6.00E-19 | 32376654 |
|  |  | body height | 4.00E-19 | 32376654 |
|  |  | chronotype measurement | 7.00E-19 | 30696823 |
|  |  | C-reactive protein measurement | 3.00E-08 | 31900758 |
|  |  | body fat percentage | 1.00E-09 | 30593698 |
|  |  | daytime rest measurement | 7.00E-41 | 33568662 |
|  |  | circadian rhythm | 3.00E-08 | 27494321 |
|  |  | sleep duration, circadian rhythm, excessive daytime sleepiness measurement, insomnia measurement | 1.00E-10 | 27992416 |
|  |  | waist-hip ratio | 8.00E-10 | 30239722 |
|  |  | body mass index | 8.00E-27 | 30595370 |
|  |  | body weight | 1.00E-16 | 34594039 |
| rs3790459 | 1:156491915 | Antimigraine preparation use measurement | 4.00E-09 | 34594039 |
| rs61823192 | 1:219121228 | diverticular disease | 1.00E-13 | 30177863 |
|  |  | BMI-adjusted hip circumference | 1.00E-19 | 34021172 |
|  |  | BMI-adjusted waist-hip ratio | 1.00E-17 | 34021172 |
|  |  | waist-hip ratio | 1.00E-09 | 30595370 |
|  |  | vital capacity | 3.00E-12 | 30595370 |
| rs1694068 | 5:53987800 | red blood cell density measurement | 1.00E-10 | 32888493 |
|  |  | Agents acting on the renin-angiotensin system use measurement | 2.00E-08 | 31015401 |
|  |  | pulse pressure measurement | 6.00E-10 | 27841878 |
|  |  | reticulocyte count | 8.00E-15 | 27863252 |
|  |  | high density lipoprotein cholesterol measurement | 2.00E-09 | 33462484 |
|  |  | Calcium channel blocker use measurement | 3.00E-08 | 34594039 |
|  |  | total blood protein measurement | 1.00E-08 | 34594039 |
|  |  | systolic blood pressure | 9.00E-17 | 30595370 |
|  |  | type 2 diabetes mellitus | 9.00E-09 | 34594039 |
|  |  | non-alcoholic fatty liver disease | 4.00E-10 | 35047847 |
| rs4704043 | 5:72863352 | serum gamma-glutamyl transferase measurement | 7.00E-17 | 33972514 |
| rs72801474 | 5:133108436 | triglyceride measurement | 5.00E-19 | 32203549 |
|  |  | balding measurement | 3.00E-15 | 30573740 |
|  |  | BMI-adjusted waist circumference | 3.00E-16 | 31669095 |
|  |  | BMI-adjusted waist-hip ratio | 2.00E-19 | 31669095 |
|  |  | high density lipoprotein cholesterol measurement | 1.00E-10 | 32203549 |
|  |  | alkaline phosphatase measurement | 1.00E-18 | 33972514 |
|  |  | glycoprotein measurement | 2.00E-09 | 35213538 |
|  |  | waist-hip ratio | 9.00E-18 | 30595370 |
|  |  | leukocyte count | 3.00E-11 | 30595370 |
|  |  | cardiovascular disease | 8.00E-12 | 30595370 |
| rs35742417 | 6:7247111 | fasting blood glucose measurement | 8.00E-09 | 25625282 |
|  |  | HbA1c measurement | 3.00E-29 | 33462484 |
|  |  | urate measurement | 1.00E-09 | 33462484 |
|  |  | glucose measurement | 2.00E-23 | 33462484 |
|  |  | sex hormone-binding globulin measurement | 3.00E-12 | 33462484 |
|  |  | BMI-adjusted hip circumference | 9.00E-12 | 34021172 |
|  |  | hemoglobin A1 measurement | 1.00E-26 | 34594039 |
|  |  | hemoglobin measurement | 3.00E-21 | 32327693 |
| rs4714001 | 6:36670398 | triglyceride measurement | 4.00E-09 | 32203549 |
|  |  | sex hormone-binding globulin measurement | 3.00E-08 | 32042192 |
| rs17145738 | 7:73568544 | triglyceride measurement | 2.00E-116 | 29507422 |
|  |  | high density lipoprotein cholesterol measurement | 2.00E-16 | 33339817 |
|  |  | urate measurement | 5.00E-11 | 31578528 |
|  |  | low density lipoprotein cholesterol measurement | 5.00E-09 | 29403010 |
|  |  | Hypertriglyceridemia | 2.00E-13 | 27599772 |
| rs3829126 | 10:72954419 | triglyceride measurement | 2.00E-11 | 32203549 |
| rs56271783 | 11:64237251 | high density lipoprotein cholesterol measurement | 3.00E-34 | 32203549 |
|  |  | triglyceride measurement | 8.00E-44 | 32203549 |
|  |  | BMI-adjusted hip circumference | 3.00E-08 | 34021172 |
|  |  | BMI-adjusted waist circumference | 3.00E-24 | 34021172 |
|  |  | BMI-adjusted waist-hip ratio | 5.00E-44 | 34021172 |
|  |  | waist-hip ratio | 2.00E-37 | 30595370 |
|  |  | apolipoprotein A 1 measurement | 2.00E-17 | 32203549 |
| rs636672 | 11:78885928 | serum gamma-glutamyl transferase measurement | 3.00E-18 | 34594039 |
| rs141949189 | 11:119086678 | apolipoprotein A 1 measurement | 1.00E-20 | 32203549 |
|  |  | high density lipoprotein cholesterol measurement | 9.00E-10 | 35213538 |
|  |  | very low-density lipoprotein cholesterol measurement, lipid or lipoprotein measurement | 3.00E-08 | 35213538 |
|  |  | cholesteryl ester measurement, high density lipoprotein cholesterol measurement | 2.00E-09 | 35213538 |
|  |  | lipid or lipoprotein measurement, high density lipoprotein cholesterol measurement | 5.00E-10 | 35213538 |
|  |  | lipid measurement, high density lipoprotein cholesterol measurement | 1.00E-10 | 35213538 |
|  |  | phospholipid measurement, high density lipoprotein cholesterol measurement | 3.00E-10 | 35213538 |
|  |  | free cholesterol measurement, high density lipoprotein cholesterol measurement | 6.00E-11 | 35213538 |
| rs2851443 | 12:123209703 | BMI-adjusted waist circumference | 2.00E-08 | 34021172 |
| rs1778793 | 13:27869951 | serum gamma-glutamyl transferase measurement | 5.00E-68 | 33972514 |
| rs7999034 | 13:110368531 | BMI-adjusted waist-hip ratio | 1.00E-09 | 34021172 |
| rs3759584 | 14:103524462 | body height | 1.00E-11 | 32376654 |
|  | 14:103524462 | eosinophil count | 2.00E-10 | 30595370 |

| | **Supplementary Table 6**. MR effect estimates for the associations between alanine aminotransferase and risk of prostate  cancer after excluding potential pleiotropic SNPs. | | | | | | | | --- | --- | --- | --- | --- | --- | --- | | Method | No. of SNPs | OR (95% CI) | *P* for association | *P* for heterogeneity | *P* intercept from MR-Egger regression | | Inverse-variance weighted | 200 | 0.40 (0.24, 0.67) | 5.04×10-4 | <0.001 |  | | Maximum-likelihood | 200 | 0.40 (0.24, 0.68) | 5.39×10-4 |  |  | | MR-RAPS | 200 | 0.53 (0.40, 0.70) | 1.06×10-5 |  |  | | MR-PRESSO | 187 | 0.51 (0.34, 0.76) | 1.22×10-3 |  |  | | MR-Egger | 200 | / | / |  | 0.067 | |
| --- | --- | --- | --- | --- | --- | --- | --- | --- | --- | --- | --- | --- | --- | --- | --- | --- | --- | --- | --- | --- | --- | --- | --- | --- | --- | --- | --- | --- | --- | --- | --- | --- | --- | --- | --- | --- | --- | --- | --- | --- | --- | --- | --- |


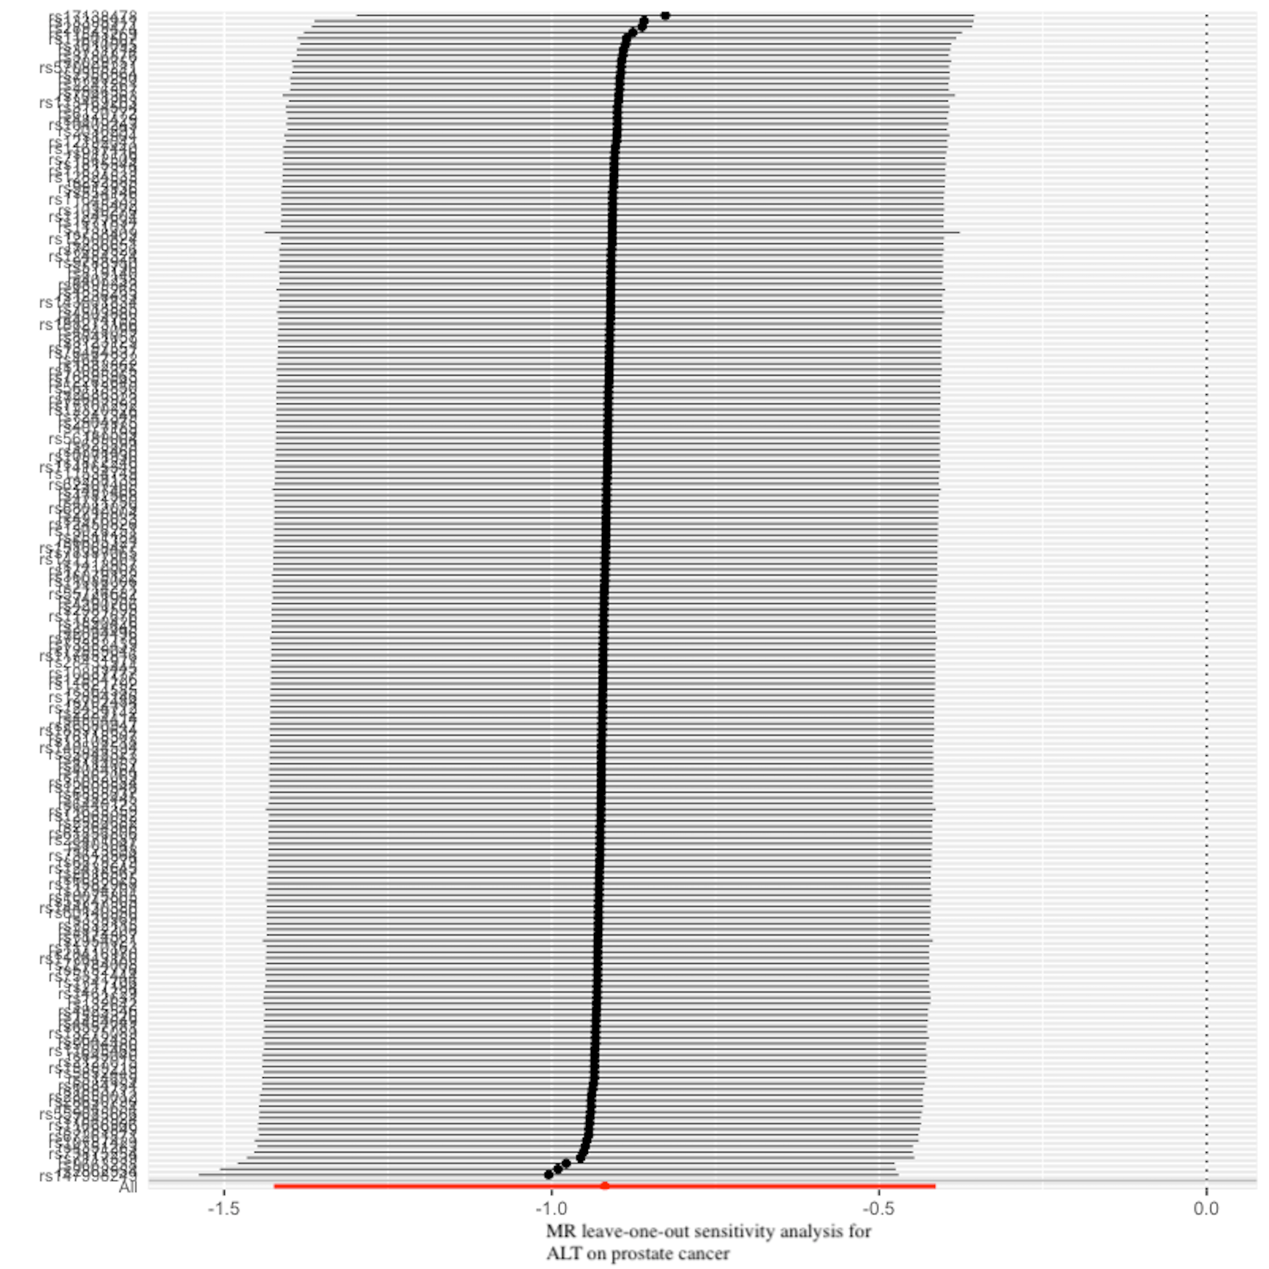


**Supplementary Figure 1**. Leave-one-out sensitivity analysis for the association of genetically determined ALT levels with the risk of prostate cancer. The horizontal lines correspond to the OR and 95% CI using the inverse variance weighted method.
